# Supplementary material for: Synthesis of multi-substituted 4-aminopyridines via ring-opening and recyclization reactions of 2-iminopyridines
Source: Royal Society of Chemistry journal article supplement (doi:10.1039/c4ra02428a), 2014-01-01

**Synthesis of Multi-Substituted 4-Aminopyridines via Ring-Opening and Recyclization  
Reactions of 2-Iminopyridines**

Fenguo Zhou,<sup>[a,b]</sup> Ning Zhang,<sup>[a]</sup> Xiaoqing Xin,<sup>[a]</sup> Xun Zhang,<sup>[a]</sup> Yongjiu Liang,<sup>[a,\*]</sup> Rui Zhang<sup>[a]</sup> and Dewen  
Dong<sup>[a,\*]</sup>

[a] *Changchun Institute of Applied Chemistry, Chinese Academy of Sciences, Changchun 130022, China*

[b] *School of Chemistry and Environmental Engineering, Changchun University of Science and Technology,  
Changchun 130022, China*

E-mail: yjliang@ciac.ac.cn; dwdong@ciac.ac.cn

**Electronic Supplementary Information (ESI)**

|                                                         |    |
|---------------------------------------------------------|----|
| Table of contents.....                                  | S1 |
| I . Copies of NMR spectra for products 2, 3 and 4. .... | S2 |

# I . Copies of NMR spectra for products 2, 3 and 4.

2a

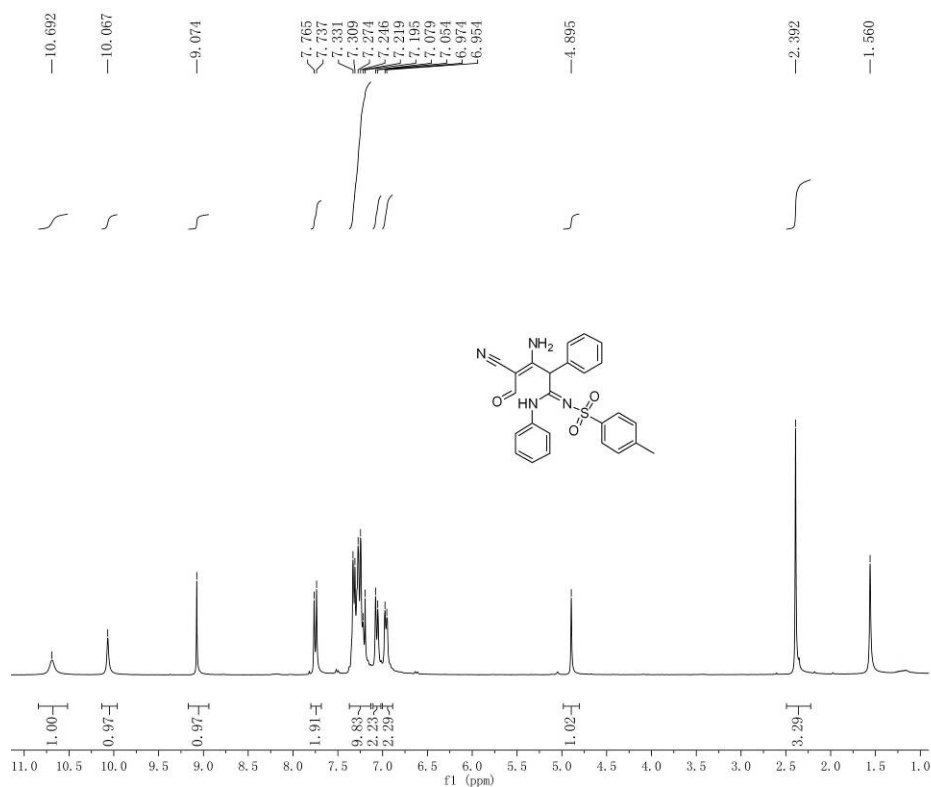

| Parameter                 | Value               |
|---------------------------|---------------------|
| 1 Title                   | zfg-201308-21-1h    |
| 2 Comment                 | 1H                  |
| 3 Origin                  | Bruker BioSpin GmbH |
| 4 Owner                   | nmr                 |
| 5 Site                    |                     |
| 6 Spectrometer            | specter             |
| 7 Author                  |                     |
| 8 Solvent                 | CDCl3               |
| 9 Temperature             | 0.0                 |
| 10 Pulse Sequence         | zg30                |
| 11 Experiment ID          |                     |
| 12 Number of Scans        | 7                   |
| 13 Receiver Gain          | 193                 |
| 14 Relaxation Delay       | 2.0000              |
| 15 Pulse Width            | 10.0000             |
| 16 Acquisition Time       | 2.6477              |
| 17 Acquisition Date       | 2013-08-21 15:41:21 |
| 18 Modification Date      | 2013-08-21 15:41:36 |
| 19 Spectrometer Frequency | 300.13              |
| 20 Spectral Width         | 6188.1              |
| 21 Lowest Frequency       | -1318.2             |
| 22 Nucleus                | 1H                  |
| 23 Acquired Size          | 16384               |
| 24 Spectral Size          | 32768               |

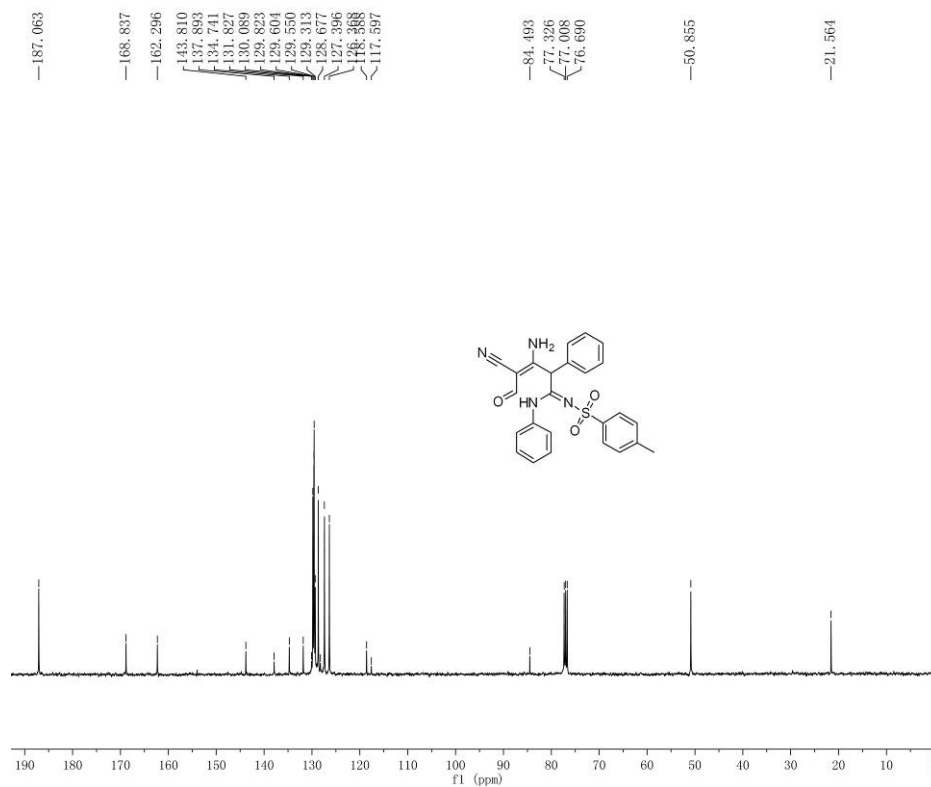

| Parameter                 | Value                               |
|---------------------------|-------------------------------------|
| 1 Title                   | ZFG0924                             |
| 2 Comment                 | zfg-1-c                             |
| 3 Origin                  | Bruker Analytische Messtechnik GmbH |
| 4 Owner                   | root                                |
| 5 Site                    |                                     |
| 6 Spectrometer            | av400er                             |
| 7 Author                  |                                     |
| 8 Solvent                 | CDCl3                               |
| 9 Temperature             | 300.0                               |
| 10 Pulse Sequence         | zgdc                                |
| 11 Experiment ID          |                                     |
| 12 Number of Scans        | 1181                                |
| 13 Receiver Gain          | 8192                                |
| 14 Relaxation Delay       | 0.5000                              |
| 15 Pulse Width            | 2.9000                              |
| 16 Acquisition Time       | 0.3269                              |
| 17 Acquisition Date       | 2013-09-24 12:31:00                 |
| 18 Modification Date      | 2013-09-29 10:8:19:16               |
| 19 Spectrometer Frequency | 100.57                              |
| 20 Spectral Width         | 25062.7                             |
| 21 Lowest Frequency       | -1517.5                             |
| 22 Nucleus                | 13C                                 |
| 23 Acquired Size          | 8192                                |
| 24 Spectral Size          | 16384                               |

2b

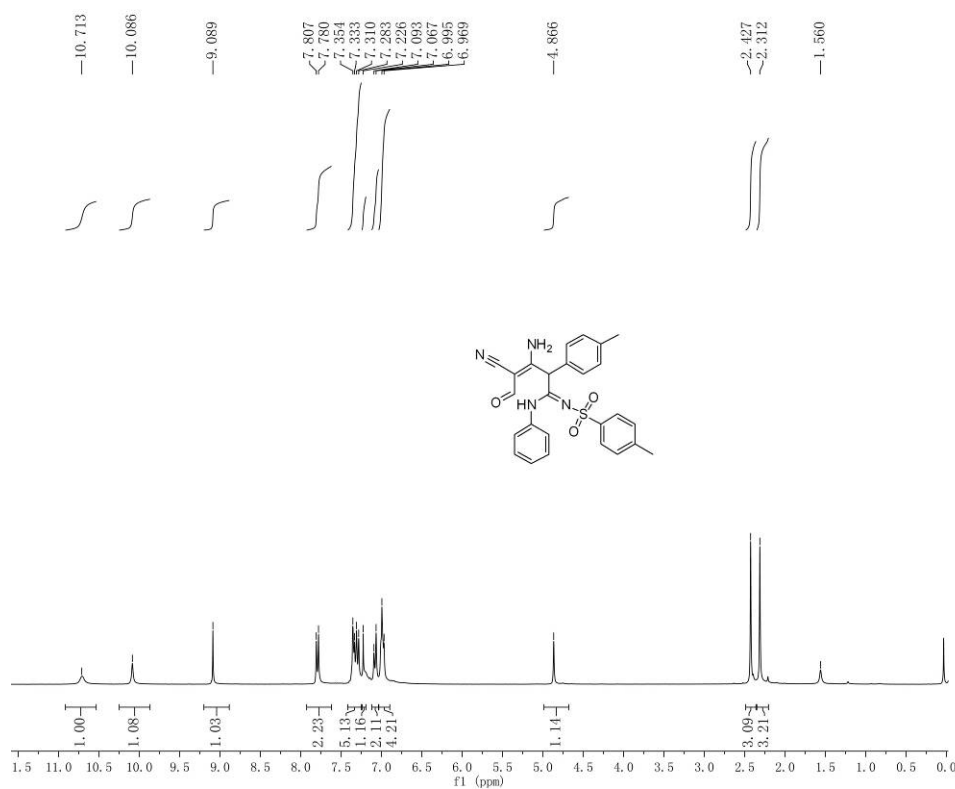

| Parameter                 | Value               |
|---------------------------|---------------------|
| 1 Title                   | zfg-20130           |
| 2 Comment                 | 821-1h              |
| 3 Origin                  | Bruker BioSpin GmbH |
| 4 Owner                   | nmr                 |
| 5 Site                    |                     |
| 6 Spectrometer            | spect               |
| 7 Author                  |                     |
| 8 Solvent                 | CDCl3               |
| 9 Temperature             | 0.0                 |
| 10 Pulse Sequence         | zg30                |
| 11 Experiment ID          |                     |
| 12 Number of Scans        | 8                   |
| 13 Receiver Gain          | 193                 |
| 14 Relaxation Delay       | 2.0000              |
| 15 Pulse Width            | 10.0000             |
| 16 Acquisition Time       | 2.6477              |
| 17 Acquisition Date       | 2013-08-2           |
| 18 Modification Date      | 2013-08-2           |
| 19 Spectrometer Frequency | 300.13              |
| 20 Spectral Width         | 6188.1              |
| 21 Lowest Frequency       | -1293.3             |
| 22 Nucleus                | 1H                  |
| 23 Acquired Size          | 16384               |
| 24 Spectral Size          | 32768               |

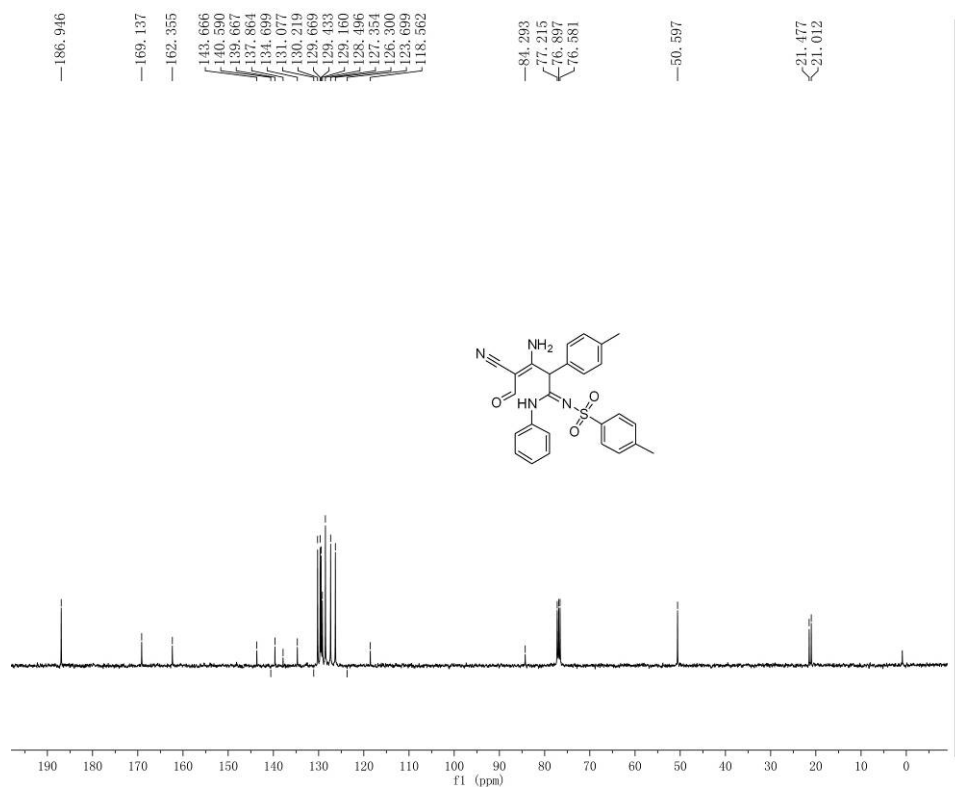

| Parameter                 | Value                                     |
|---------------------------|-------------------------------------------|
| 1 Title                   | ZFG0924                                   |
| 2 Comment                 | ZFG-2                                     |
| 3 Origin                  | UXMR, Bruker Analytische Messtechnik GmbH |
| 4 Owner                   | root                                      |
| 5 Site                    |                                           |
| 6 Spectrometer            | av400                                     |
| 7 Author                  |                                           |
| 8 Solvent                 | CDCl3                                     |
| 9 Temperature             | 300.0                                     |
| 10 Pulse Sequence         | zgdc                                      |
| 11 Experiment ID          |                                           |
| 12 Number of Scans        | 879                                       |
| 13 Receiver Gain          | 8192                                      |
| 14 Relaxation Delay       | 0.5000                                    |
| 15 Pulse Width            | 2.9000                                    |
| 16 Acquisition Time       | 0.3269                                    |
| 17 Acquisition Date       | 2013-09-25                                |
| 18 Modification Date      | 2013-09-29                                |
| 19 Spectrometer Frequency | 100.57                                    |
| 20 Spectral Width         | 25062.7                                   |
| 21 Lowest Frequency       | -1525.9                                   |
| 22 Nucleus                | 13C                                       |
| 23 Acquired Size          | 8192                                      |
| 24 Spectral Size          | 16384                                     |

2c

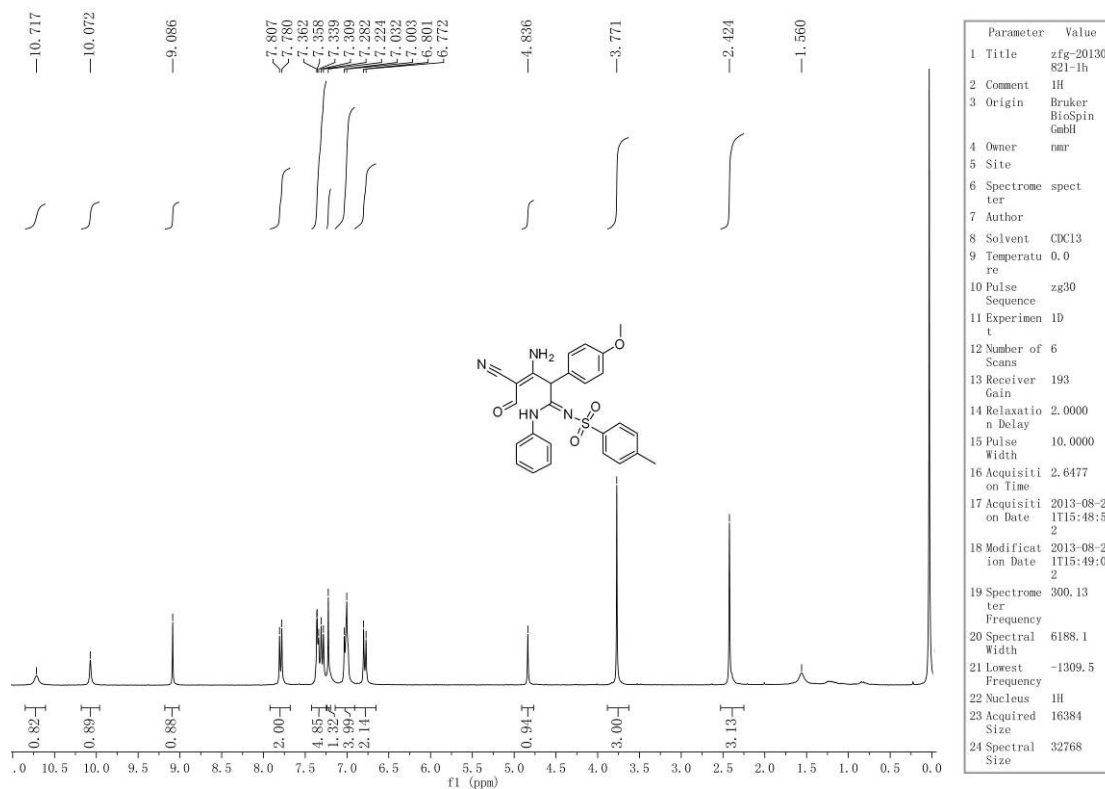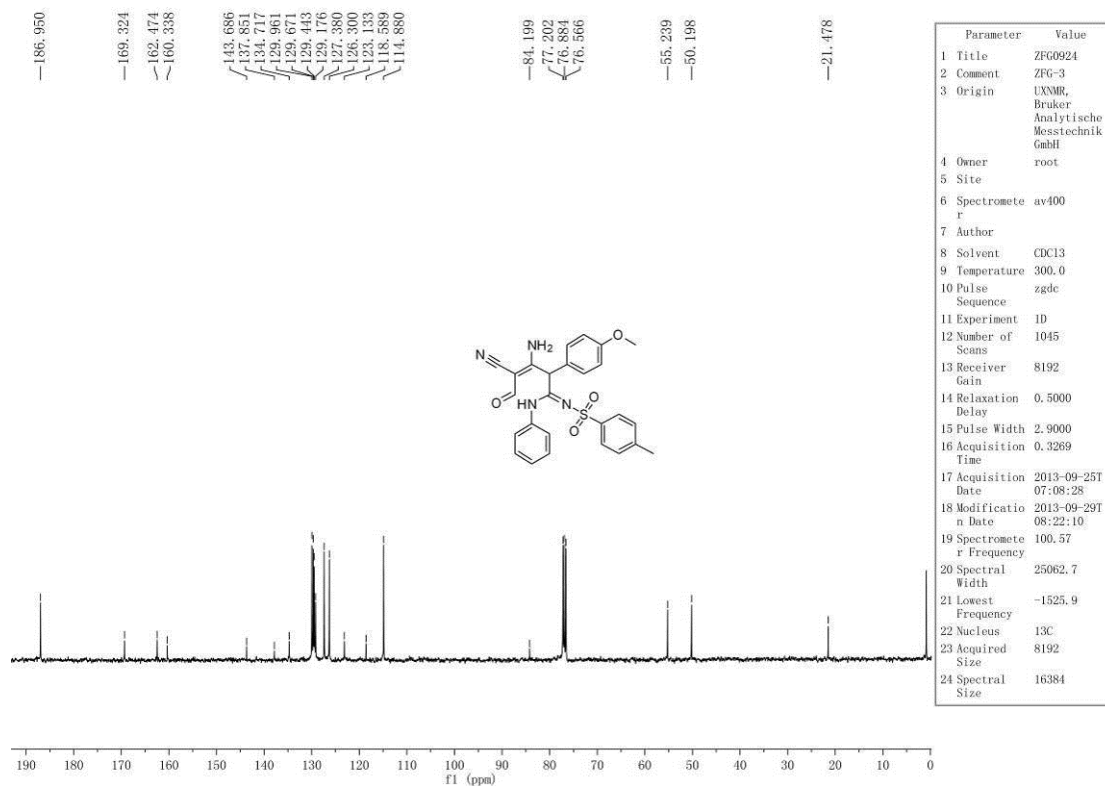

2d

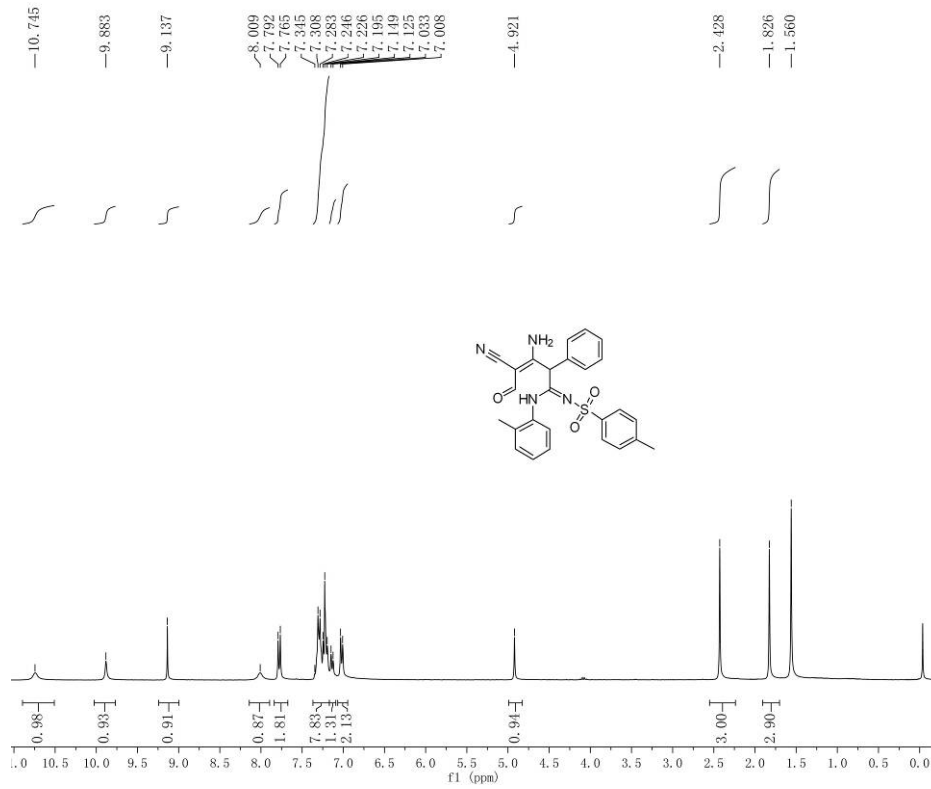

| Parameter                 | Value               |
|---------------------------|---------------------|
| 1 Title                   | zfg-20130821-1h     |
| 2 Comment                 | 1H                  |
| 3 Origin                  | Bruker BioSpin GmbH |
| 4 Owner                   | nmr                 |
| 5 Site                    |                     |
| 6 Spectrometer            | specter             |
| 7 Author                  |                     |
| 8 Solvent                 | CDC13               |
| 9 Temperature             | 0.0 °C              |
| 10 Pulse Sequence         | zg30                |
| 11 Experiment ID          |                     |
| 12 Number of Scans        | 9                   |
| 13 Receiver Gain          | 193                 |
| 14 Relaxation Delay       | 2.0000              |
| 15 Pulse Width            | 10.0000             |
| 16 Acquisition Time       | 2.6477              |
| 17 Acquisition Date       | 2013-08-21 15:44:29 |
| 18 Modification Date      | 2013-08-21 15:44:52 |
| 19 Spectrometer Frequency | 300.13              |
| 20 Spectral Width         | 6188.1              |
| 21 Lowest Frequency       | -1308.9             |
| 22 Nucleus                | 1H                  |
| 23 Acquired Size          | 16384               |
| 24 Spectral Size          | 32768               |

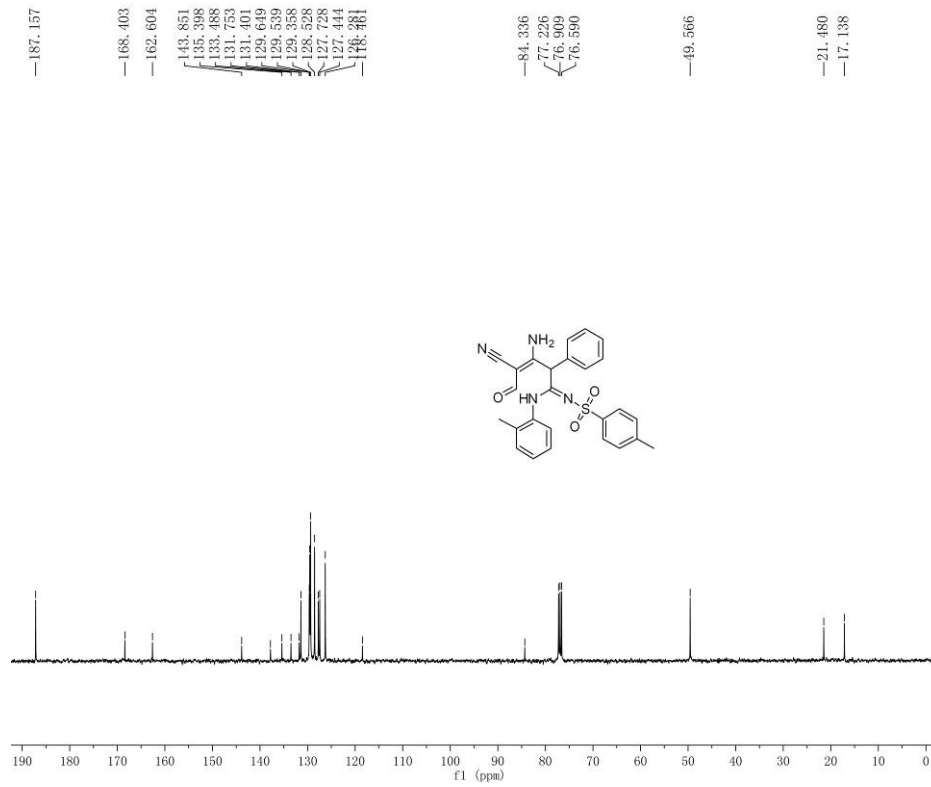

| Parameter                 | Value                                      |
|---------------------------|--------------------------------------------|
| 1 Title                   | ZFG0924                                    |
| 2 Comment                 | ZFG-4                                      |
| 3 Origin                  | UXNMR, Bruker Analytische Messtechnik GmbH |
| 4 Owner                   | root                                       |
| 5 Site                    |                                            |
| 6 Spectrometer            | av400                                      |
| 7 Author                  |                                            |
| 8 Solvent                 | CDC13                                      |
| 9 Temperature             | 300.0 °C                                   |
| 10 Pulse Sequence         | zgdc                                       |
| 11 Experiment ID          |                                            |
| 12 Number of Scans        | 446                                        |
| 13 Receiver Gain          | 8192                                       |
| 14 Relaxation Delay       | 0.5000                                     |
| 15 Pulse Width            | 2.9000                                     |
| 16 Acquisition Time       | 0.3269                                     |
| 17 Acquisition Date       | 2013-09-25 10:19:00                        |
| 18 Modification Date      | 2013-09-29 10:8:22:24                      |
| 19 Spectrometer Frequency | 100.57                                     |
| 20 Spectral Width         | 25062.7                                    |
| 21 Lowest Frequency       | -1525.9                                    |
| 22 Nucleus                | 13C                                        |
| 23 Acquired Size          | 8192                                       |
| 24 Spectral Size          | 16384                                      |

2e

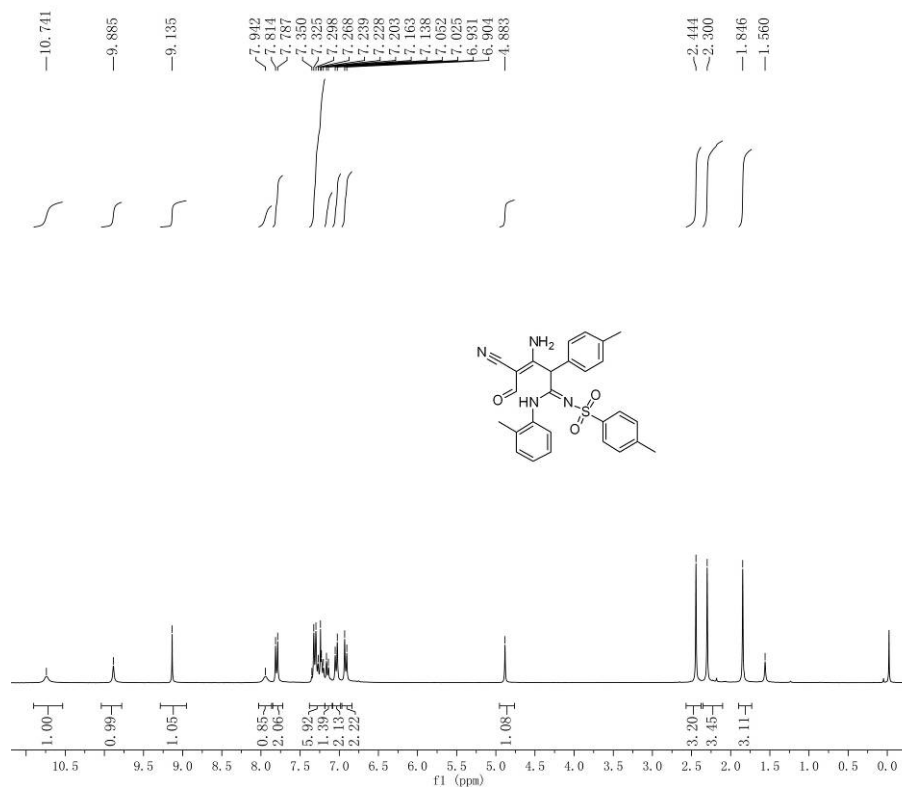

| Parameter                 | Value               |
|---------------------------|---------------------|
| 1 Title                   | zfg-20130821        |
| 2 Comment                 | -lh                 |
| 3 Origin                  | Bruker BioSpin GmbH |
| 4 Owner                   | nmr                 |
| 5 Site                    |                     |
| 6 Spectrometer            | spect               |
| 7 Author                  |                     |
| 8 Solvent                 | CDCl3               |
| 9 Temperature             | 0.0                 |
| 10 Pulse Sequence         | zg30                |
| 11 Experiment             | 1D                  |
| 12 Number of Scans        | 6                   |
| 13 Receiver Gain          | 193                 |
| 14 Relaxation Delay       | 2.0000              |
| 15 Pulse Width            | 10.0000             |
| 16 Acquisition Time       | 2.6477              |
| 17 Acquisition Date       | 2013-08-21T15:56:58 |
| 18 Modification Date      | 2013-08-21T15:57:16 |
| 19 Spectrometer Frequency | 300.13              |
| 20 Spectral Width         | 6188.1              |
| 21 Lowest Frequency       | -1305.0             |
| 22 Nucleus                | 1H                  |
| 23 Acquired Size          | 16384               |
| 24 Spectral Size          | 32768               |

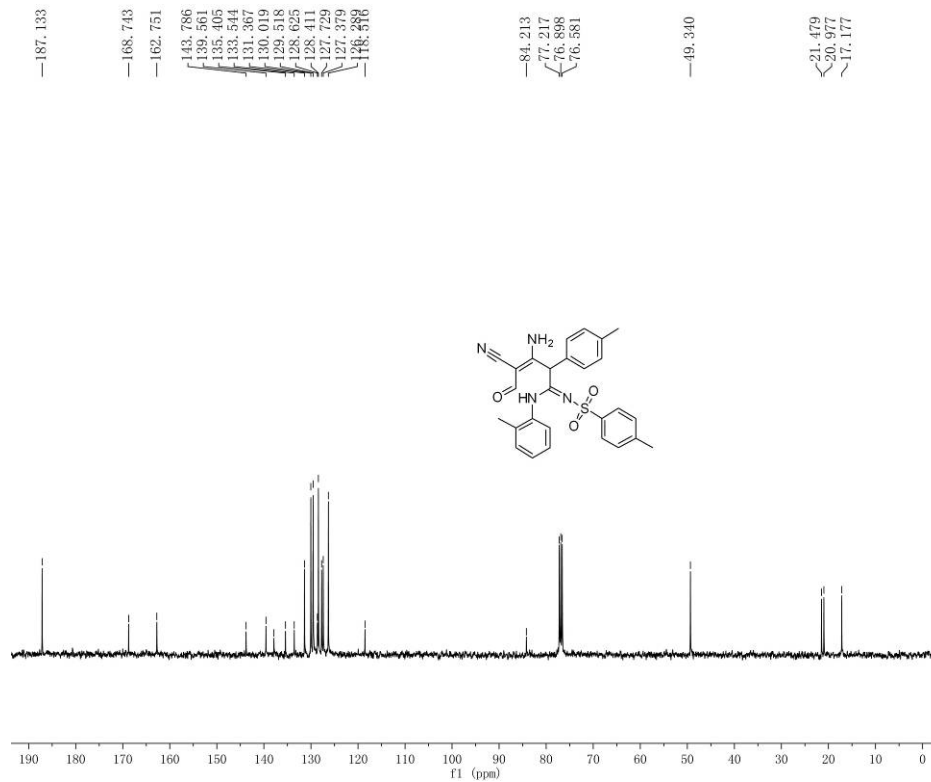

| Parameter                 | Value                                      |
|---------------------------|--------------------------------------------|
| 1 Title                   | ZFG0924                                    |
| 2 Comment                 | ZFG-5                                      |
| 3 Origin                  | UXNMR, Bruker Analytische Messtechnik GmbH |
| 4 Owner                   | root                                       |
| 5 Site                    |                                            |
| 6 Spectrometer            | av400                                      |
| 7 Author                  |                                            |
| 8 Solvent                 | CDCl3                                      |
| 9 Temperature             | 300.0                                      |
| 10 Pulse Sequence         | zgdc                                       |
| 11 Experiment             | 1D                                         |
| 12 Number of Scans        | 573                                        |
| 13 Receiver Gain          | 8192                                       |
| 14 Relaxation Delay       | 0.5000                                     |
| 15 Pulse Width            | 2.9000                                     |
| 16 Acquisition Time       | 0.3269                                     |
| 17 Acquisition Date       | 2013-09-25T21:30:33                        |
| 18 Modification Date      | 2013-09-29T08:22:40                        |
| 19 Spectrometer Frequency | 100.57                                     |
| 20 Spectral Width         | 25062.7                                    |
| 21 Lowest Frequency       | -1525.9                                    |
| 22 Nucleus                | 13C                                        |
| 23 Acquired Size          | 8192                                       |
| 24 Spectral Size          | 16384                                      |

2f

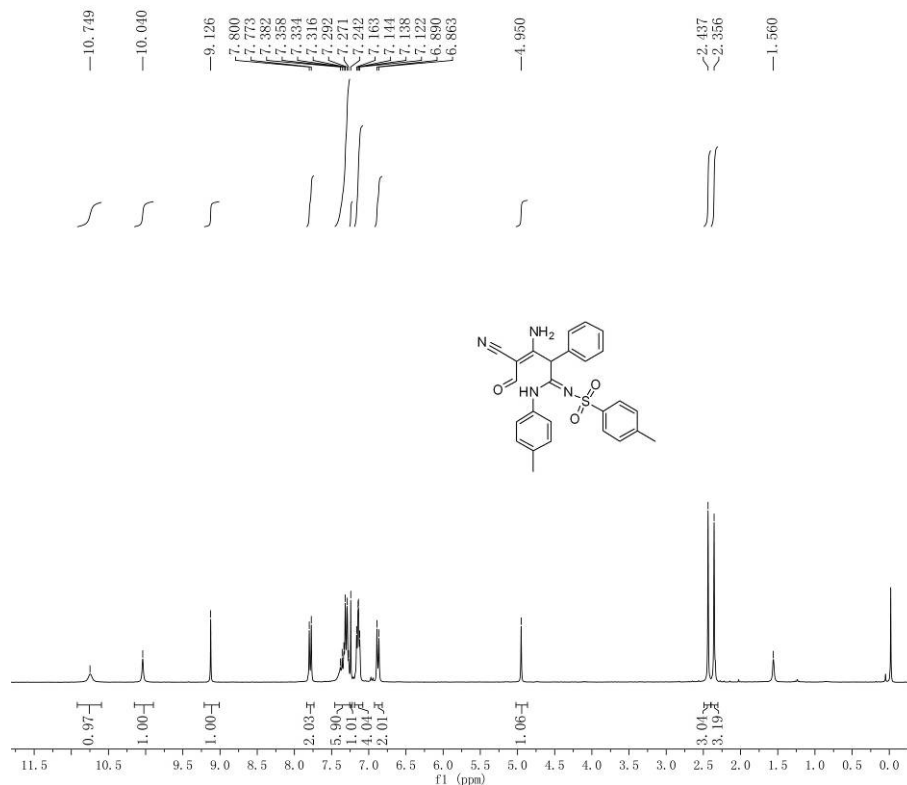

| Parameter                 | Value               |
|---------------------------|---------------------|
| 1 Title                   | zfg-20130821-lh     |
| 2 Comment                 | lh                  |
| 3 Origin                  | Bruker BioSpin GmbH |
| 4 Owner                   | nmr                 |
| 5 Site                    |                     |
| 6 Spectrometer spect      |                     |
| 7 Author                  |                     |
| 8 Solvent                 | CDCl3               |
| 9 Temperature             | 0.0                 |
| 10 Pulse Sequence         | zg30                |
| 11 Experiment ID          |                     |
| 12 Number of Scans        | 7                   |
| 13 Receiver Gain          | 193                 |
| 14 Relaxation Delay       | 2.0000              |
| 15 Pulse Width            | 10.0000             |
| 16 Acquisition Time       | 2.6477              |
| 17 Acquisition Date       | 2013-08-21T16:07:33 |
| 18 Modification Date      | 2013-08-21T16:07:46 |
| 19 Spectrometer Frequency | 300.13              |
| 20 Spectral Width         | 6188.1              |
| 21 Lowest Frequency       | -1304.1             |
| 22 Nucleus                | 1H                  |
| 23 Acquired Size          | 16384               |
| 24 Spectral Size          | 32768               |

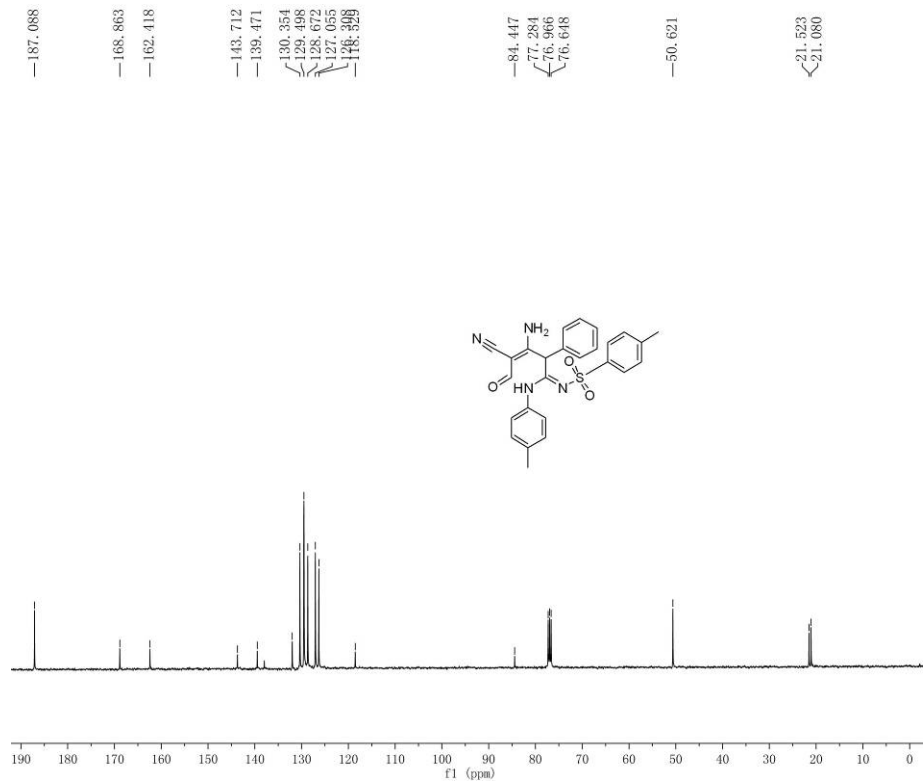

| Parameter                  | Value                                     |
|----------------------------|-------------------------------------------|
| 1 Title                    | ZFG1105                                   |
| 2 Comment                  | ZFG-2                                     |
| 3 Origin                   | UXMR, Bruker Analytische Messtechnik GmbH |
| 4 Owner                    | root                                      |
| 5 Site                     |                                           |
| 6 Spectromete r            | av400                                     |
| 7 Author                   |                                           |
| 8 Solvent                  | CDCl3                                     |
| 9 Temperature              | 300.0                                     |
| 10 Pulse Sequence          | zgdc                                      |
| 11 Experiment ID           |                                           |
| 12 Number of Scans         | 1562                                      |
| 13 Receiver Gain           | 8192                                      |
| 14 Relaxation Delay        | 0.5000                                    |
| 15 Pulse Width             | 2.9000                                    |
| 16 Acquisition Time        | 0.3269                                    |
| 17 Acquisition Date        | 2013-11-06T00:58:34                       |
| 18 Modification Date       | 2013-11-07T14:22:12                       |
| 19 Spectromete r Frequency | 100.57                                    |
| 20 Spectral Width          | 25062.7                                   |
| 21 Lowest Frequency        | -1519.4                                   |
| 22 Nucleus                 | 13C                                       |
| 23 Acquired Size           | 8192                                      |
| 24 Spectral Size           | 16384                                     |

2g

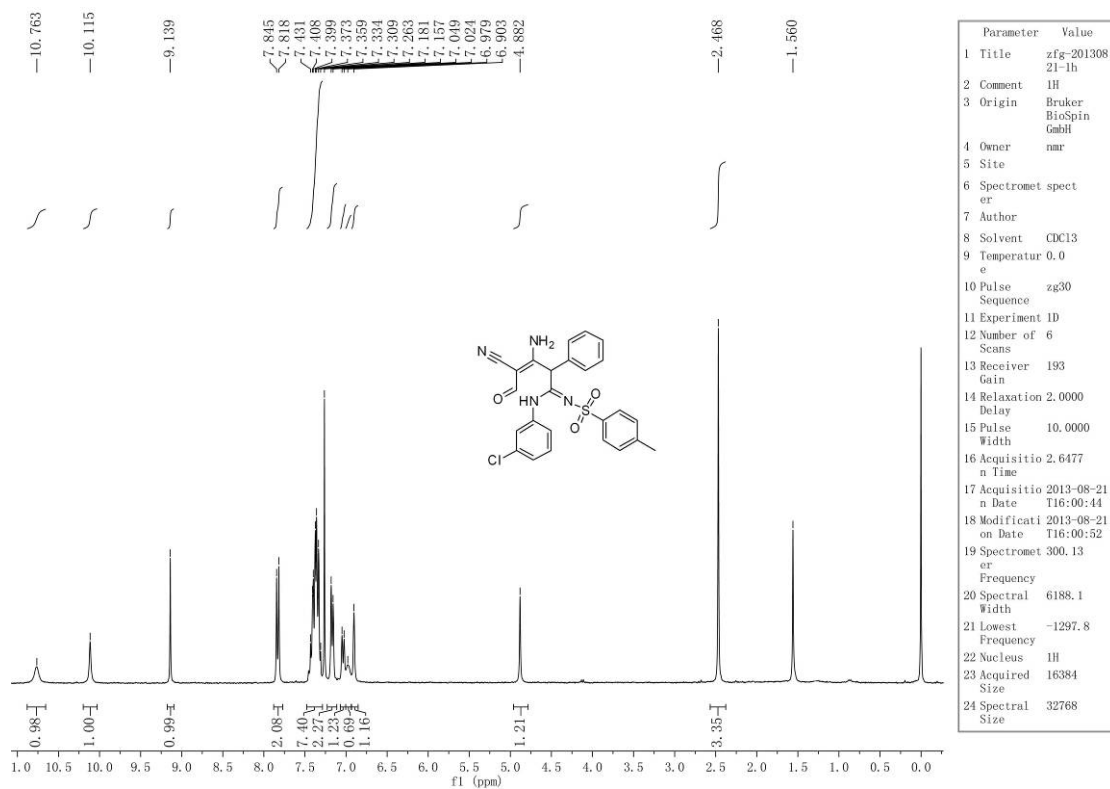

| Parameter                 | Value               |
|---------------------------|---------------------|
| 1 Title                   | zfg-201308          |
| 2 Comment                 | 21-1h               |
| 3 Origin                  | Bruker BioSpin GmbH |
| 4 Owner                   | nar                 |
| 5 Site                    |                     |
| 6 Spectrometer            | specter             |
| 7 Author                  |                     |
| 8 Solvent                 | CDCl3               |
| 9 Temperature             | 0.0 °C              |
| 10 Pulse Sequence         | zg30                |
| 11 Experiment ID          |                     |
| 12 Number of Scans        | 6                   |
| 13 Receiver Gain          | 193                 |
| 14 Relaxation Delay       | 2.0000              |
| 15 Pulse Width            | 10.0000             |
| 16 Acquisition Time       | 2.6477              |
| 17 Acquisition Date       | 2013-08-21          |
| 18 Modification Date      | 2013-08-21          |
| 19 Spectrometer Frequency | 300.13              |
| 20 Spectral Width         | 6188.1              |
| 21 Lowest Frequency       | -1297.8             |
| 22 Nucleus                | 1H                  |
| 23 Acquired Size          | 16384               |
| 24 Spectral Size          | 32768               |

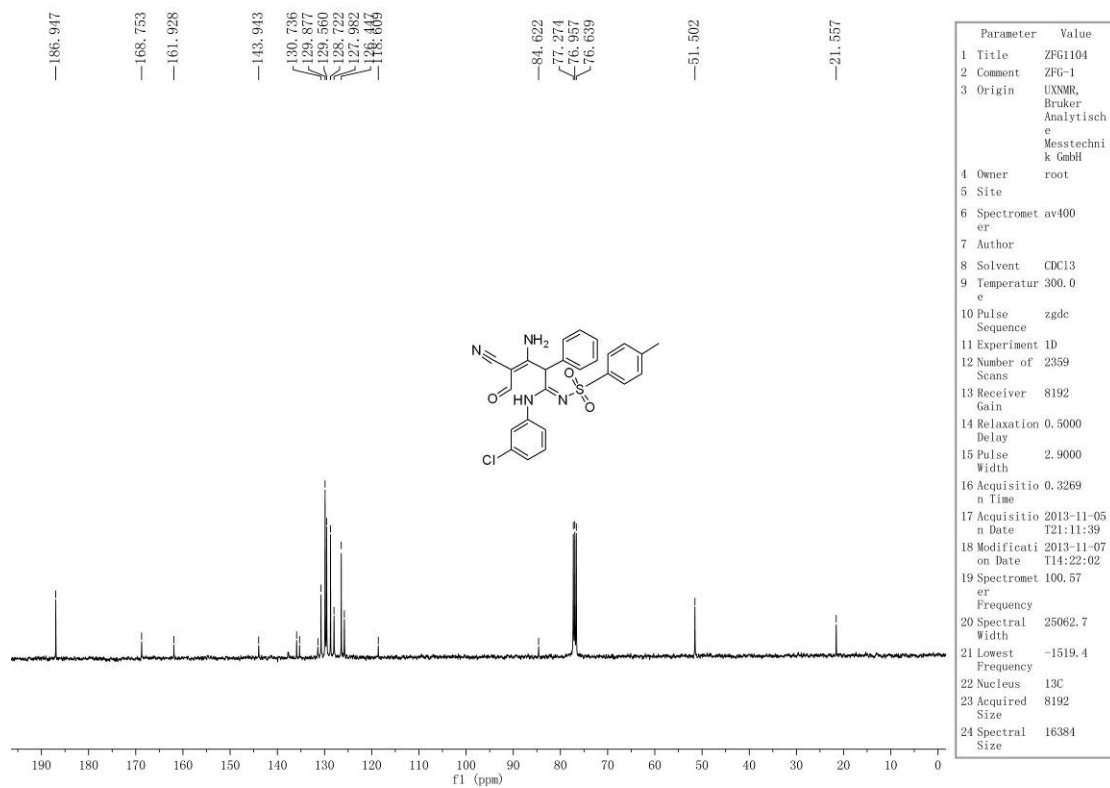

| Parameter                 | Value                                      |
|---------------------------|--------------------------------------------|
| 1 Title                   | ZFG1104                                    |
| 2 Comment                 | ZFG-1                                      |
| 3 Origin                  | UXNMR, Bruker Analytische Messtechnik GmbH |
| 4 Owner                   | root                                       |
| 5 Site                    |                                            |
| 6 Spectrometer            | av400                                      |
| 7 Author                  |                                            |
| 8 Solvent                 | CDCl3                                      |
| 9 Temperature             | 300.0 °C                                   |
| 10 Pulse Sequence         | zgdc                                       |
| 11 Experiment ID          |                                            |
| 12 Number of Scans        | 2359                                       |
| 13 Receiver Gain          | 8192                                       |
| 14 Relaxation Delay       | 0.5000                                     |
| 15 Pulse Width            | 2.9000                                     |
| 16 Acquisition Time       | 0.3269                                     |
| 17 Acquisition Date       | 2013-11-05                                 |
| 18 Modification Date      | 2013-11-07                                 |
| 19 Spectrometer Frequency | 100.57                                     |
| 20 Spectral Width         | 25062.7                                    |
| 21 Lowest Frequency       | -1519.4                                    |
| 22 Nucleus                | 13C                                        |
| 23 Acquired Size          | 8192                                       |
| 24 Spectral Size          | 16384                                      |



2h

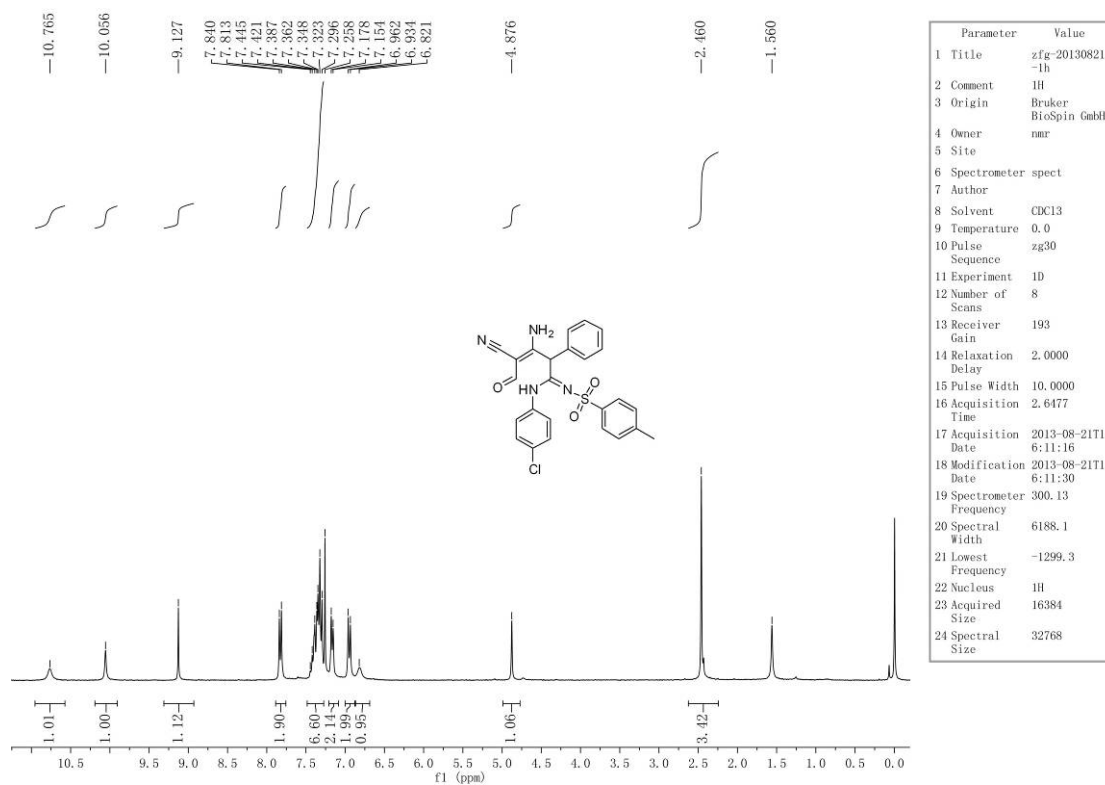

| Parameter                 | Value               |
|---------------------------|---------------------|
| 1 Title                   | zfg-20130821-1h     |
| 2 Comment                 | 1H                  |
| 3 Origin                  | Bruker BioSpin GmbH |
| 4 Owner                   | nmr                 |
| 5 Site                    |                     |
| 6 Spectrometer            | spect               |
| 7 Author                  |                     |
| 8 Solvent                 | CDCl3               |
| 9 Temperature             | 0.0                 |
| 10 Pulse Sequence         | zg30                |
| 11 Experiment             | 1D                  |
| 12 Number of Scans        | 8                   |
| 13 Receiver Gain          | 193                 |
| 14 Relaxation Delay       | 2.0000              |
| 15 Pulse Width            | 10.0000             |
| 16 Acquisition Time       | 2.6477              |
| 17 Acquisition Date       | 2013-08-21T16:11:16 |
| 18 Modification Date      | 2013-08-21T16:11:30 |
| 19 Spectrometer Frequency | 300.13              |
| 20 Spectral Width         | 6188.1              |
| 21 Lowest Frequency       | -1299.3             |
| 22 Nucleus                | 1H                  |
| 23 Acquired Size          | 16384               |
| 24 Spectral Size          | 32768               |

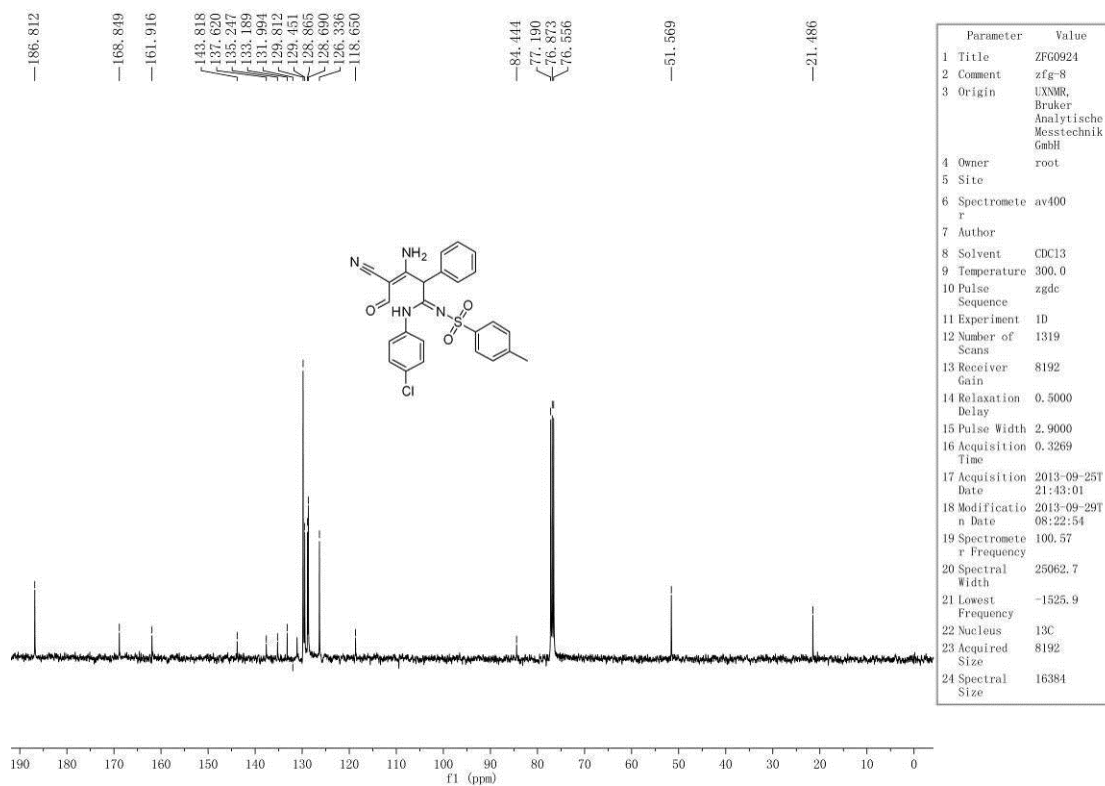

| Parameter                 | Value                                     |
|---------------------------|-------------------------------------------|
| 1 Title                   | ZFG0924                                   |
| 2 Comment                 | zfg-8                                     |
| 3 Origin                  | UXMR, Bruker Analytische Messtechnik GmbH |
| 4 Owner                   | root                                      |
| 5 Site                    |                                           |
| 6 Spectrometer            | av400r                                    |
| 7 Author                  |                                           |
| 8 Solvent                 | CDCl3                                     |
| 9 Temperature             | 300.0                                     |
| 10 Pulse Sequence         | zgdc                                      |
| 11 Experiment             | 1D                                        |
| 12 Number of Scans        | 1319                                      |
| 13 Receiver Gain          | 8192                                      |
| 14 Relaxation Delay       | 0.5000                                    |
| 15 Pulse Width            | 2.9000                                    |
| 16 Acquisition Time       | 0.3269                                    |
| 17 Acquisition Date       | 2013-09-25T21:43:01                       |
| 18 Modification Date      | 2013-09-29T08:22:54                       |
| 19 Spectrometer Frequency | 100.57                                    |
| 20 Spectral Width         | 25062.7                                   |
| 21 Lowest Frequency       | -1525.9                                   |
| 22 Nucleus                | 13C                                       |
| 23 Acquired Size          | 8192                                      |
| 24 Spectral Size          | 16384                                     |

2i

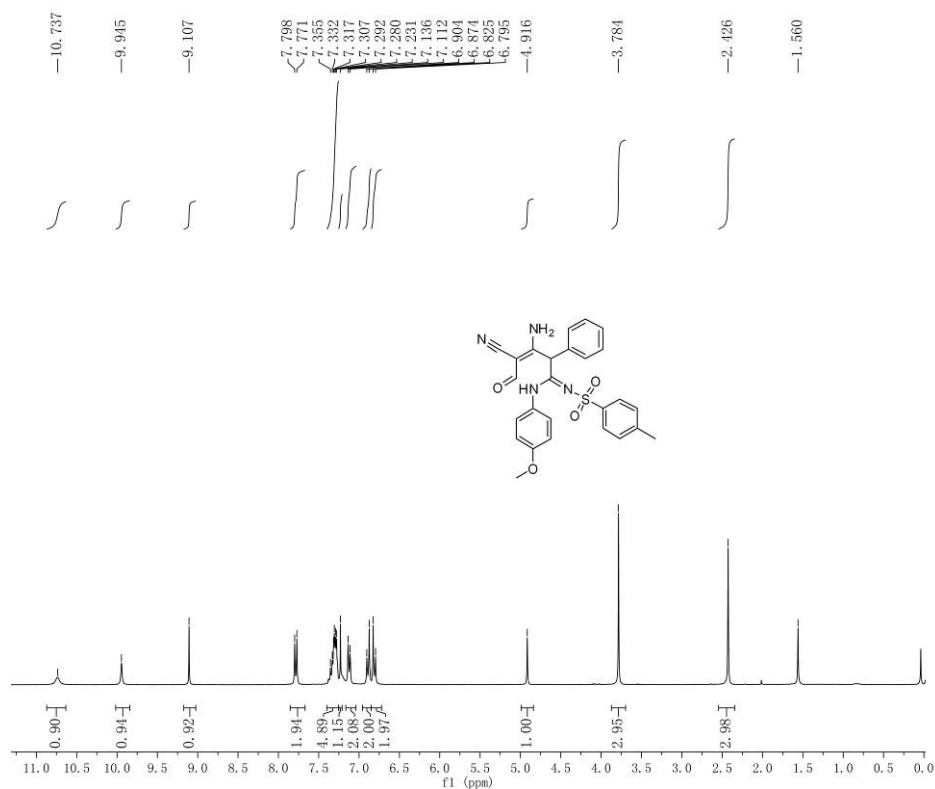

| Parameter                 | Value                |
|---------------------------|----------------------|
| 1 Title                   | zfg-201309-25-1h     |
| 2 Comment                 | 1H                   |
| 3 Origin                  | Bruker BioSpin GmbH  |
| 4 Owner                   | nmr                  |
| 5 Site                    |                      |
| 6 Spectrometer            | specter              |
| 7 Author                  |                      |
| 8 Solvent                 | CDCl3                |
| 9 Temperature             | 0.0                  |
| 10 Pulse Sequence         | zg30                 |
| 11 Experiment ID          |                      |
| 12 Number of Scans        | 12                   |
| 13 Receiver Gain          | 193                  |
| 14 Relaxation Delay       | 2.0000               |
| 15 Pulse Width            | 10.0000              |
| 16 Acquisition Time       | 2.6477               |
| 17 Acquisition Date       | 2013-09-25 14:17:39  |
| 18 Modification Date      | 2013-09-29 108:43:36 |
| 19 Spectrometer Frequency | 300.13               |
| 20 Spectral Width         | 6188.1               |
| 21 Lowest Frequency       | -1307.4              |
| 22 Nucleus                | 1H                   |
| 23 Acquired Size          | 16384                |
| 24 Spectral Size          | 32768                |

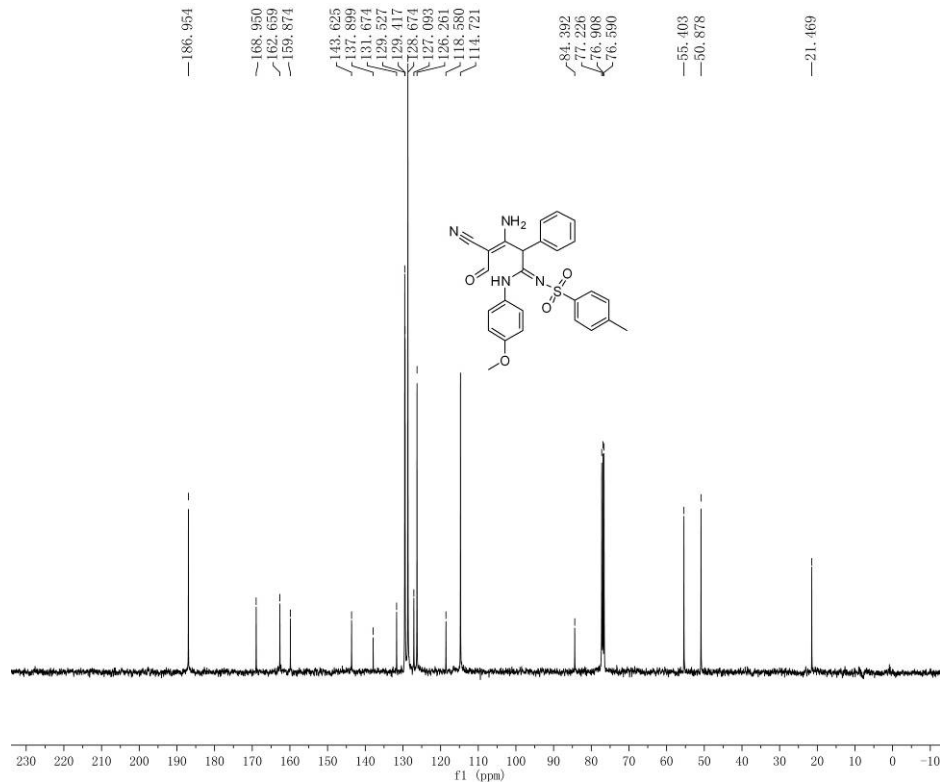

| Parameter                 | Value                                     |
|---------------------------|-------------------------------------------|
| 1 Title                   | ZF0924                                    |
| 2 Comment                 | zfg-9                                     |
| 3 Origin                  | UXMR, Bruker Analytische Messtechnik GmbH |
| 4 Owner                   | root                                      |
| 5 Site                    |                                           |
| 6 Spectrometer            | av400                                     |
| 7 Author                  |                                           |
| 8 Solvent                 | CDCl3                                     |
| 9 Temperature             | 300.0                                     |
| 10 Pulse Sequence         | zgdc                                      |
| 11 Experiment ID          |                                           |
| 12 Number of Scans        | 1267                                      |
| 13 Receiver Gain          | 8192                                      |
| 14 Relaxation Delay       | 0.5000                                    |
| 15 Pulse Width            | 2.9000                                    |
| 16 Acquisition Time       | 0.3269                                    |
| 17 Acquisition Date       | 2013-09-26 106:30:26                      |
| 18 Modification Date      | 2013-09-29 108:23:24                      |
| 19 Spectrometer Frequency | 100.57                                    |
| 20 Spectral Width         | 25062.7                                   |
| 21 Lowest Frequency       | -1525.9                                   |
| 22 Nucleus                | 13C                                       |
| 23 Acquired Size          | 8192                                      |
| 24 Spectral Size          | 16384                                     |

3a

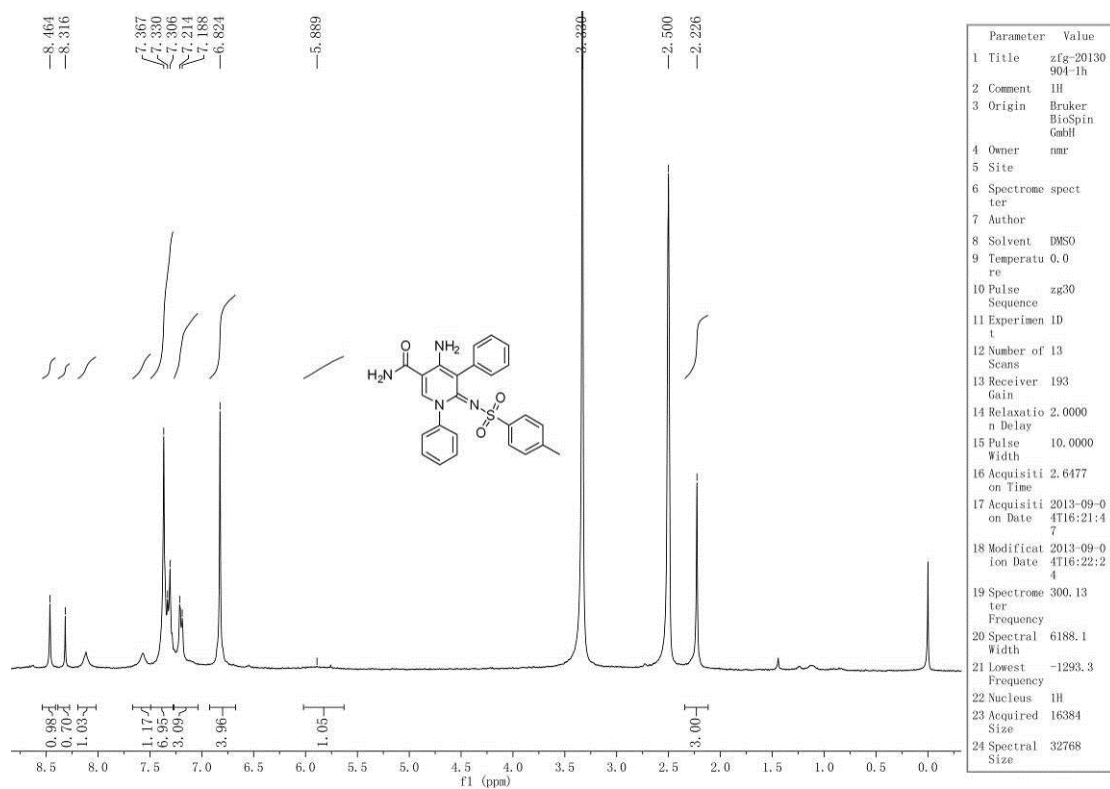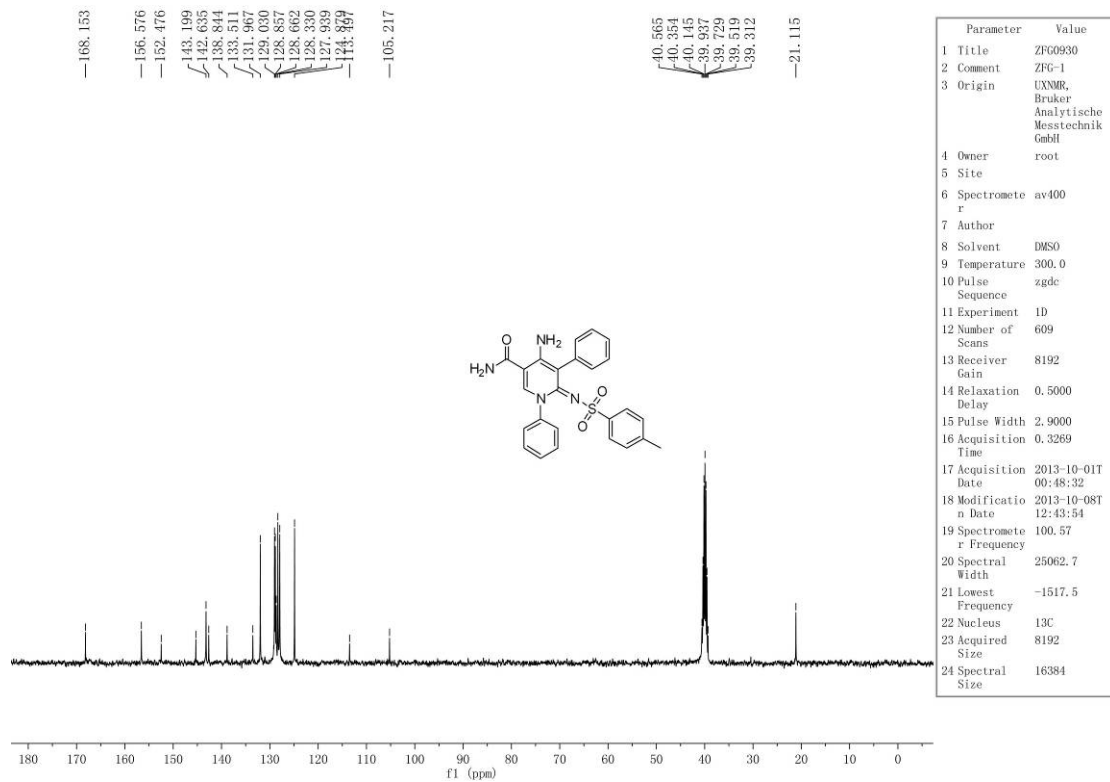

4a

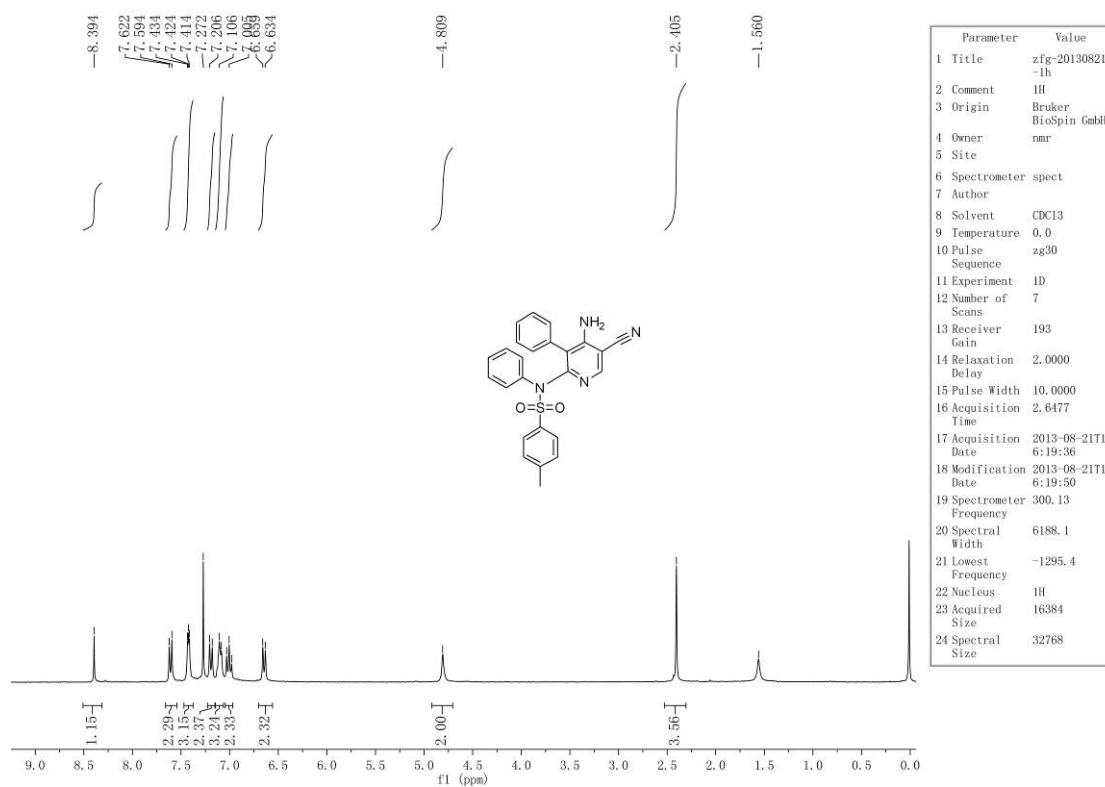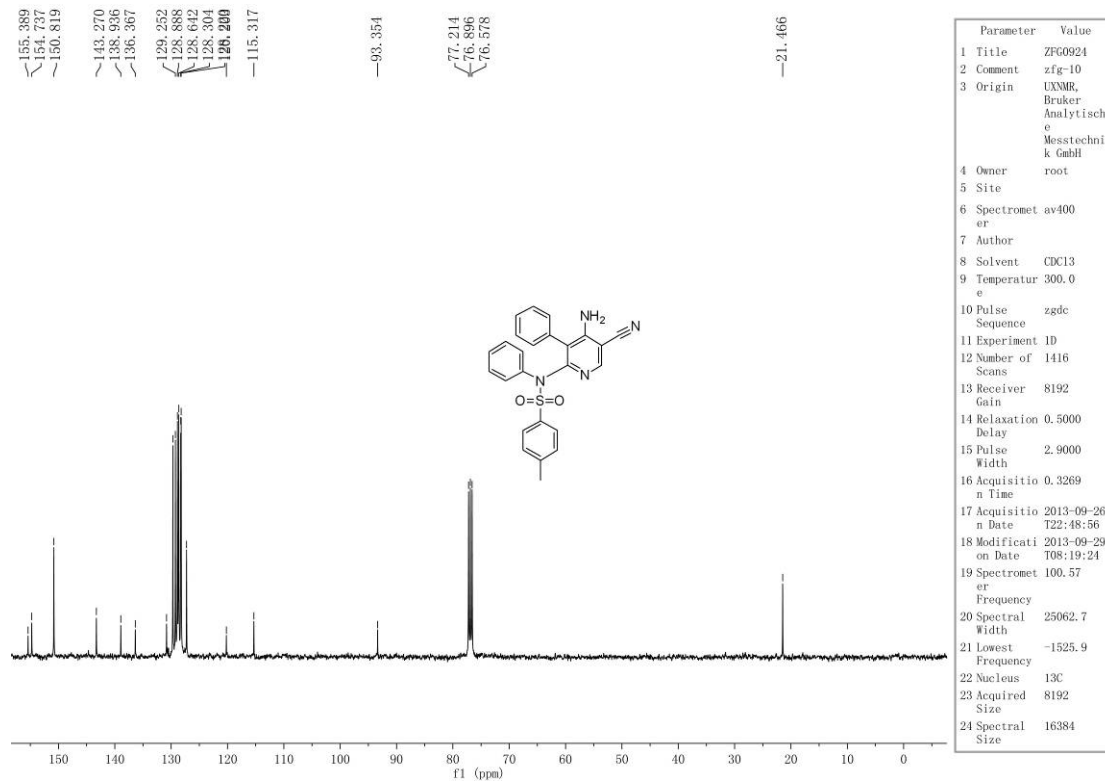

4b

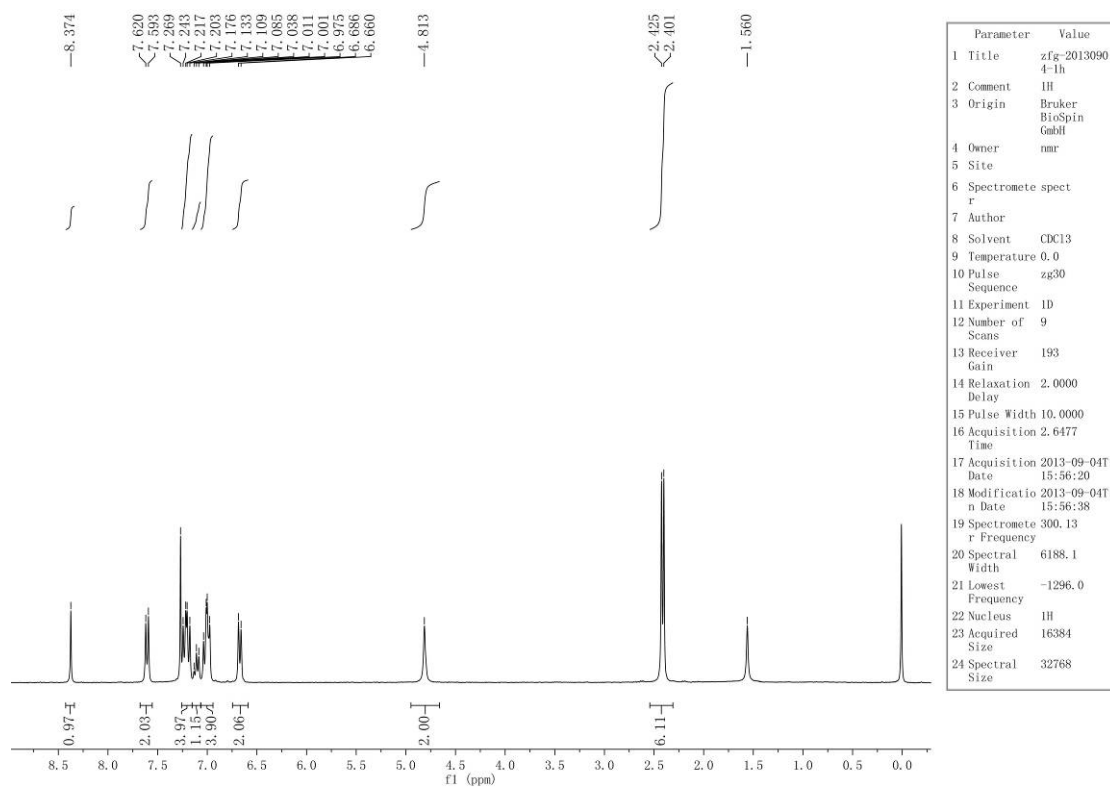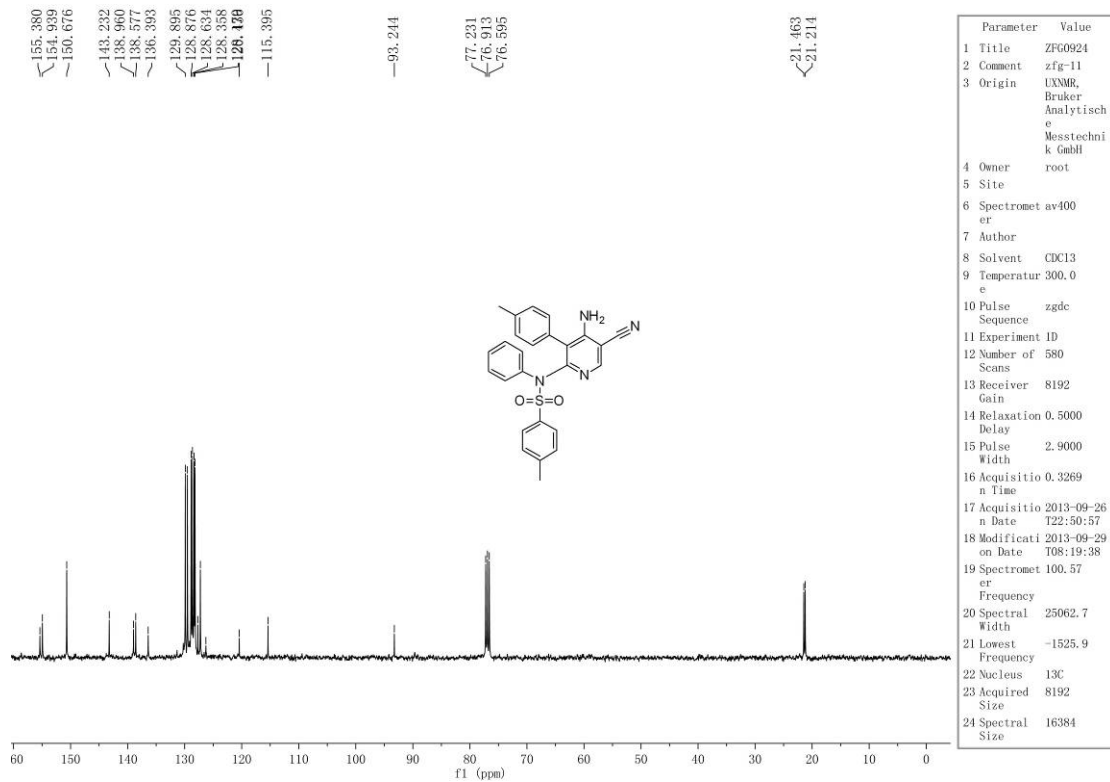

4c

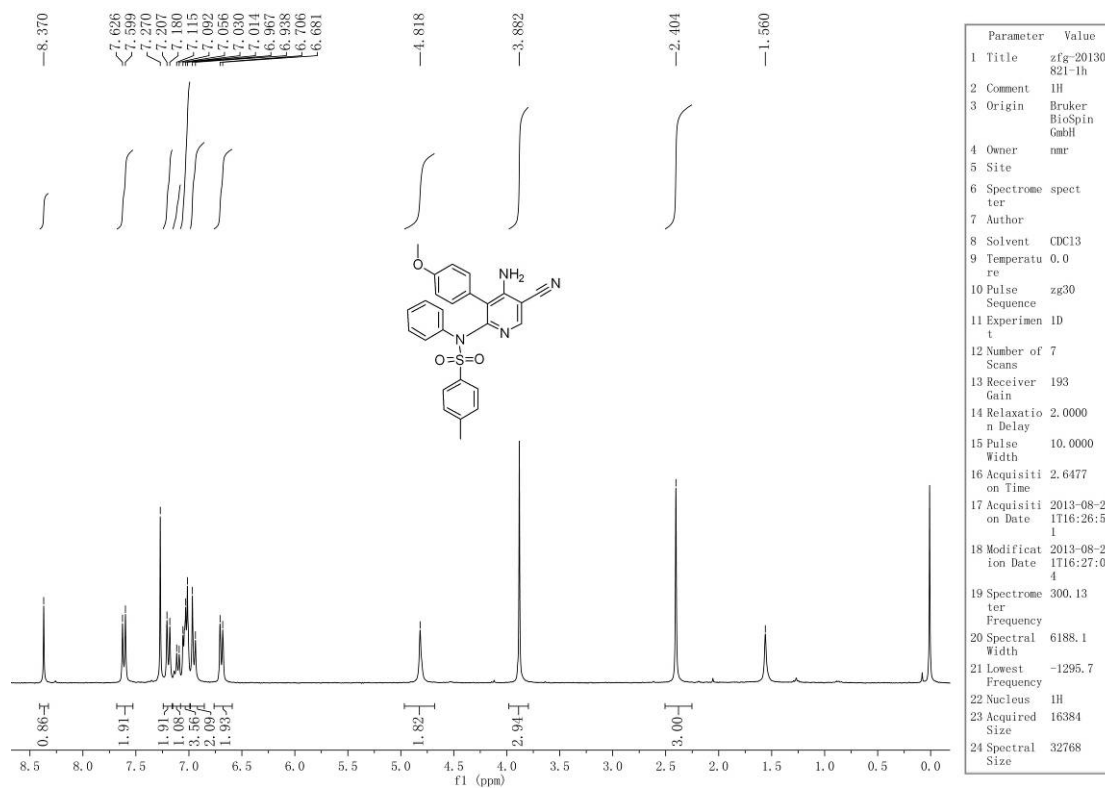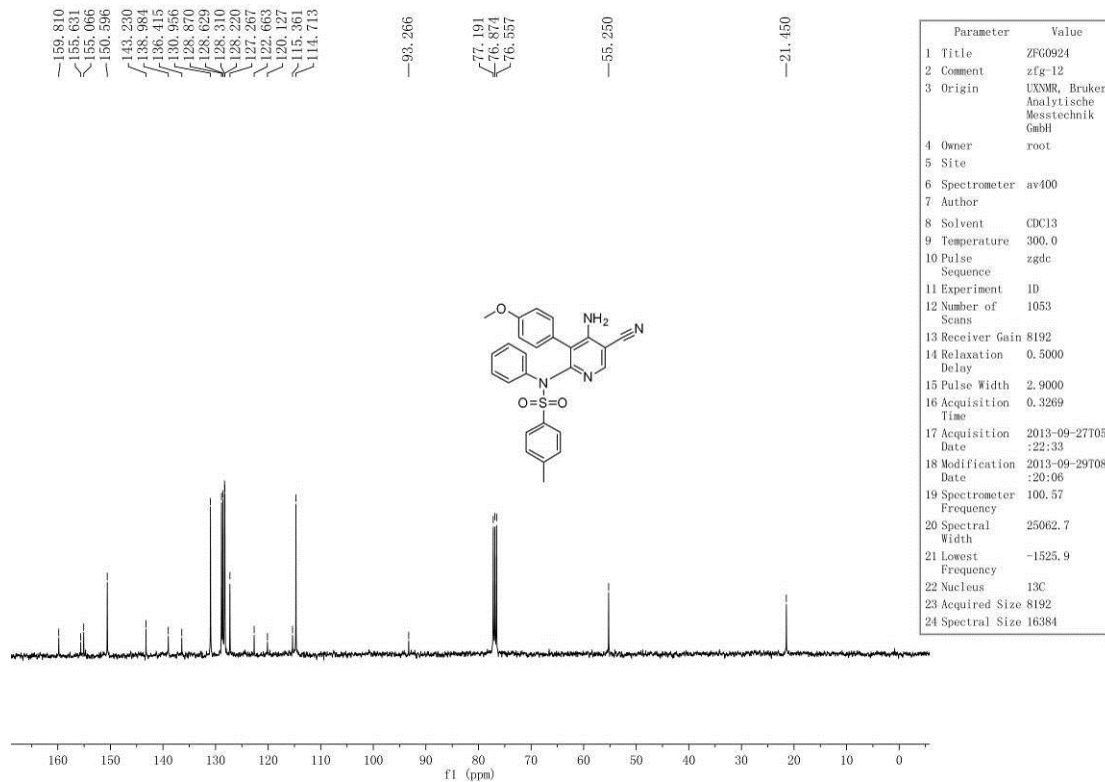

4d

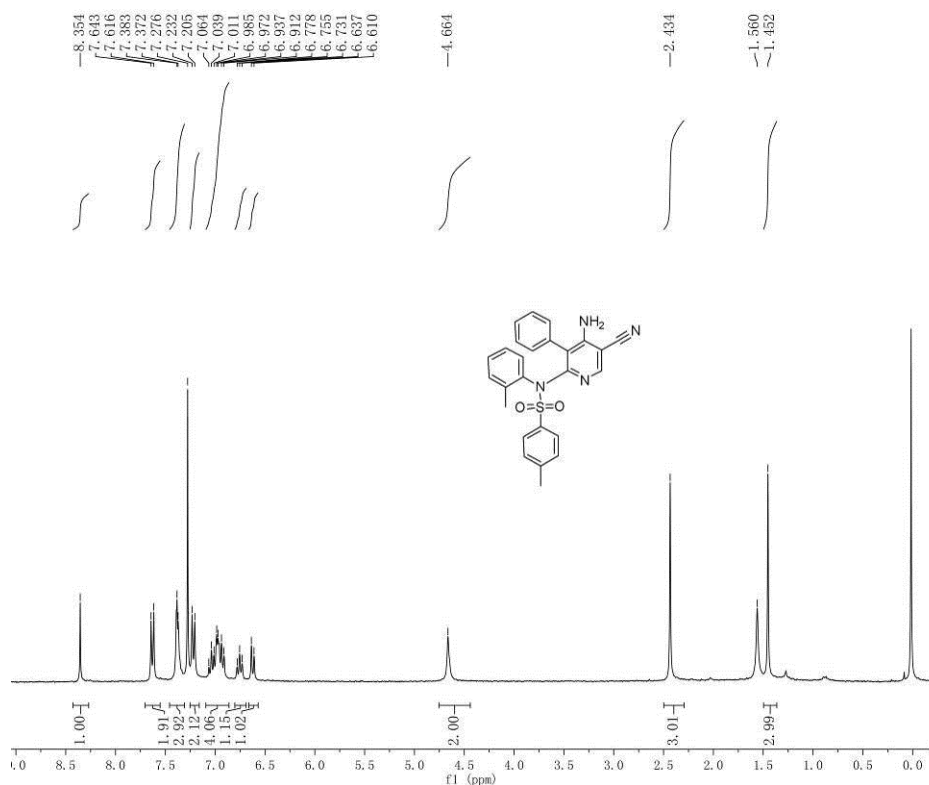

| Parameter                 | Value               |
|---------------------------|---------------------|
| 1 Title                   | zfg-201308-21-1h    |
| 2 Comment                 | 1H                  |
| 3 Origin                  | Bruker BioSpin GmbH |
| 4 Owner                   | nmr                 |
| 5 Site                    |                     |
| 6 Spectrometer            | specter             |
| 7 Author                  |                     |
| 8 Solvent                 | CDCl3               |
| 9 Temperature             | 0.0                 |
| 10 Pulse Sequence         | zg30                |
| 11 Experiment ID          | 1D                  |
| 12 Number of Scans        | 9                   |
| 13 Receiver Gain          | 193                 |
| 14 Relaxation Delay       | 2.0000              |
| 15 Pulse Width            | 10.0000             |
| 16 Acquisition Time       | 2.6477              |
| 17 Acquisition Date       | 2013-08-21 16:34:54 |
| 18 Modification Date      | 2013-08-21 16:35:22 |
| 19 Spectrometer Frequency | 300.13              |
| 20 Spectral Width         | 6188.1              |
| 21 Lowest Frequency       | -1293.9             |
| 22 Nucleus                | 1H                  |
| 23 Acquired Size          | 16384               |
| 24 Spectral Size          | 32768               |

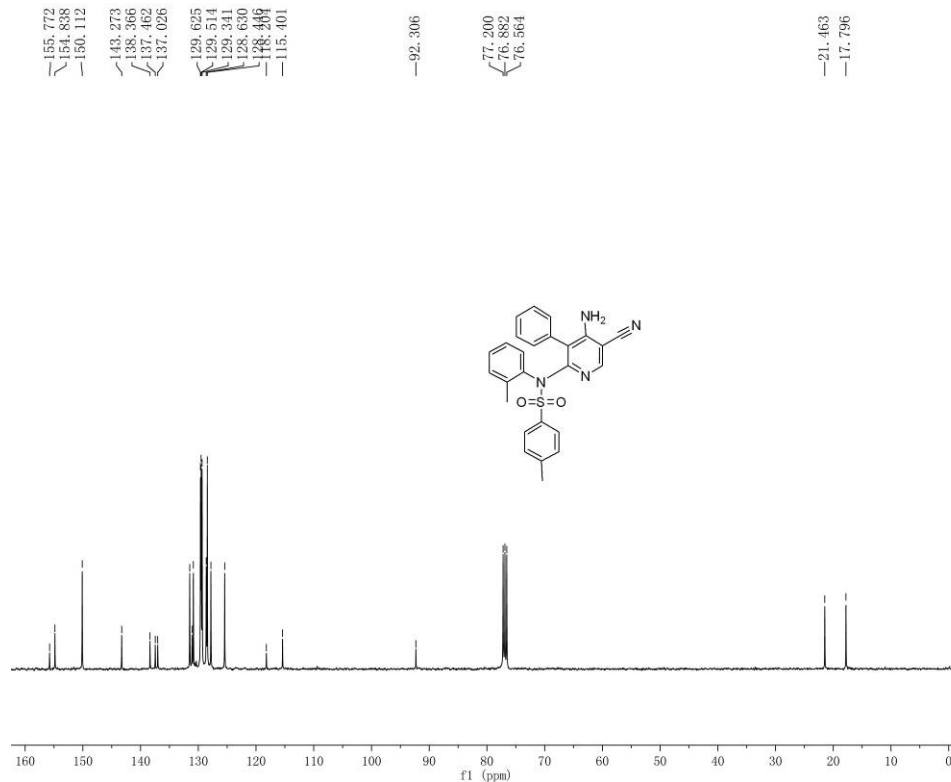

| Parameter                 | Value                                      |
|---------------------------|--------------------------------------------|
| 1 Title                   | ZFG1009                                    |
| 2 Comment                 | zfg-1                                      |
| 3 Origin                  | UXNMR, Bruker Analytische Messtechnik GmbH |
| 4 Owner                   | root                                       |
| 5 Site                    |                                            |
| 6 Spectrometer            | av400                                      |
| 7 Author                  |                                            |
| 8 Solvent                 | CDCl3                                      |
| 9 Temperature             | 300.0                                      |
| 10 Pulse Sequence         | zgdc                                       |
| 11 Experiment ID          | 1D                                         |
| 12 Number of Scans        | 6691                                       |
| 13 Receiver Gain          | 8192                                       |
| 14 Relaxation Delay       | 0.5000                                     |
| 15 Pulse Width            | 2.9000                                     |
| 16 Acquisition Time       | 0.3269                                     |
| 17 Acquisition Date       | 2013-10-10 10:56:21                        |
| 18 Modification Date      | 2013-10-12 11:53:58                        |
| 19 Spectrometer Frequency | 100.57                                     |
| 20 Spectral Width         | 25062.7                                    |
| 21 Lowest Frequency       | -1525.9                                    |
| 22 Nucleus                | 13C                                        |
| 23 Acquired Size          | 8192                                       |
| 24 Spectral Size          | 16384                                      |

4e

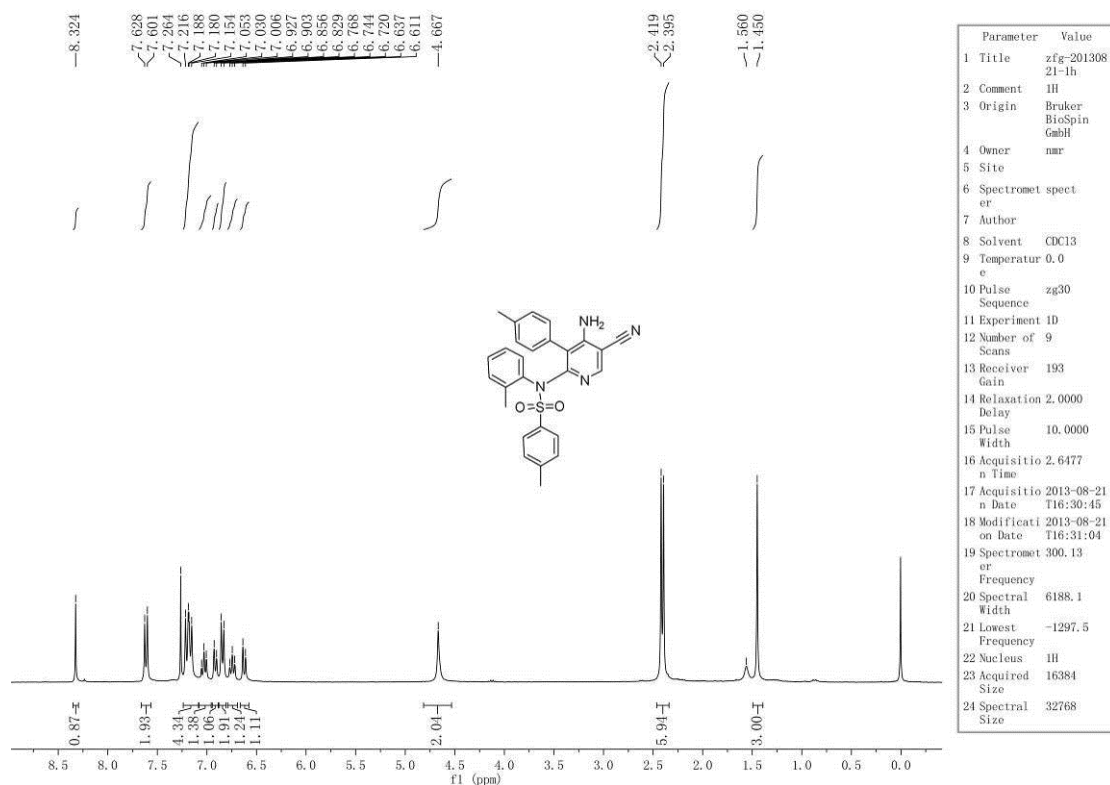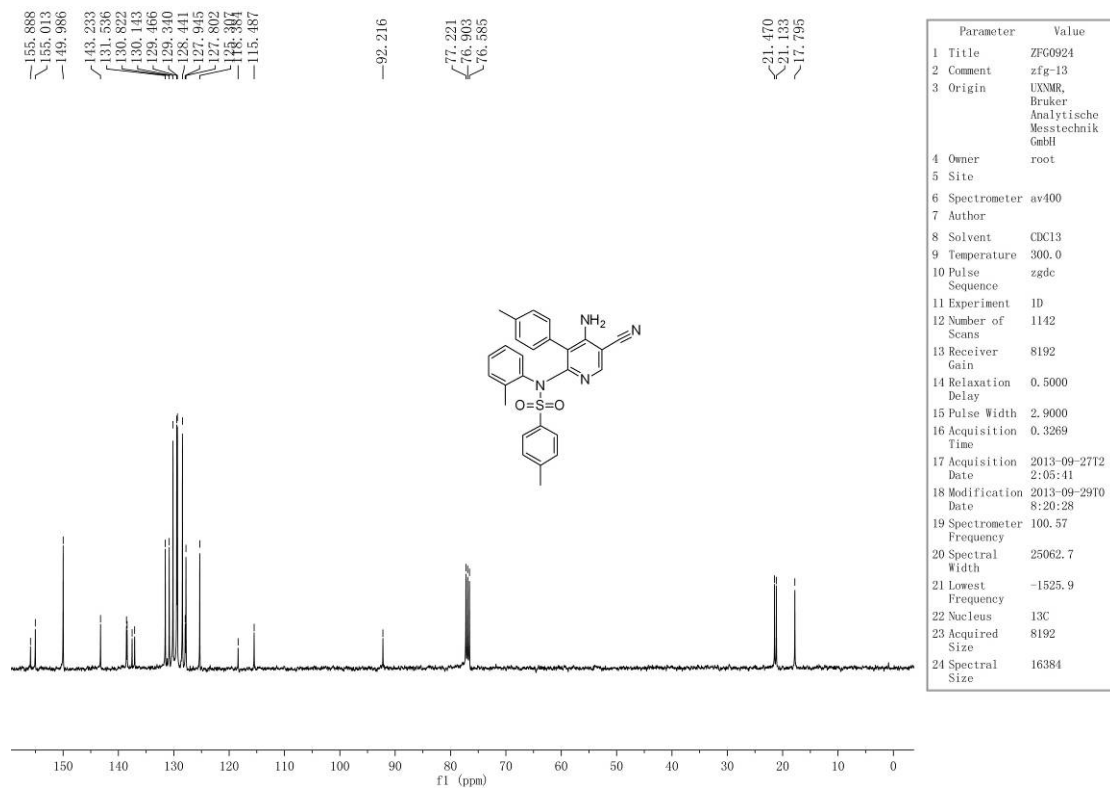



4f

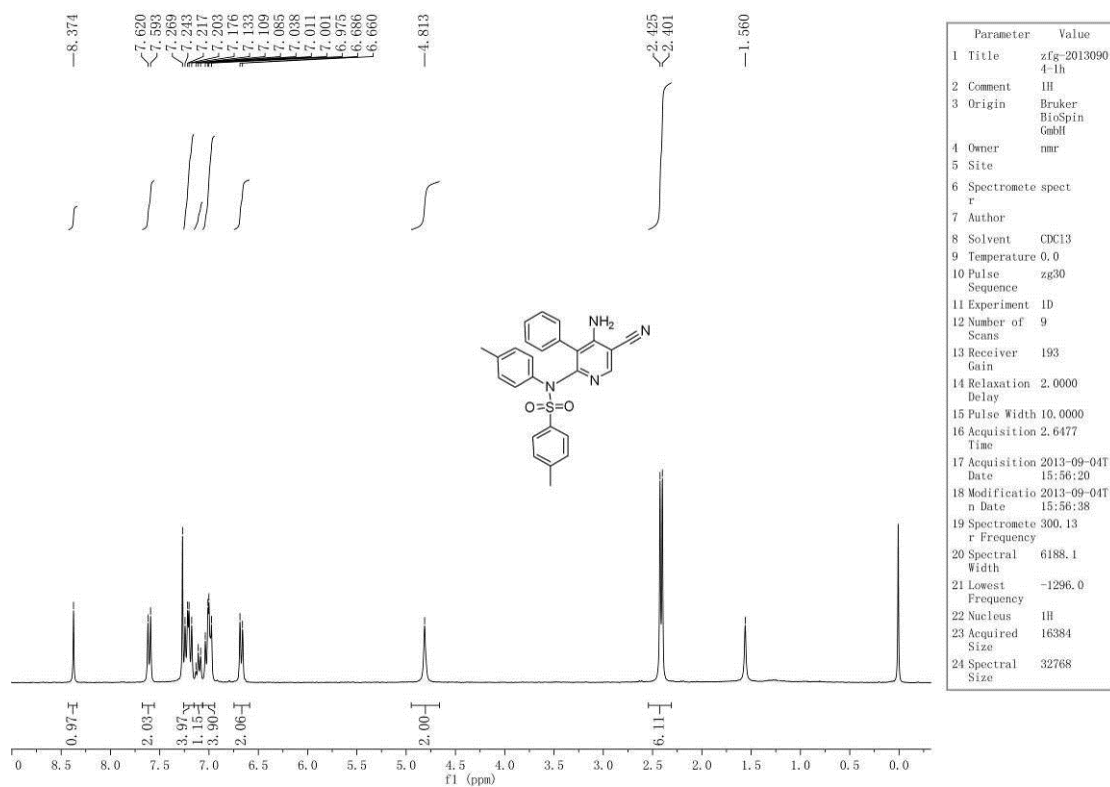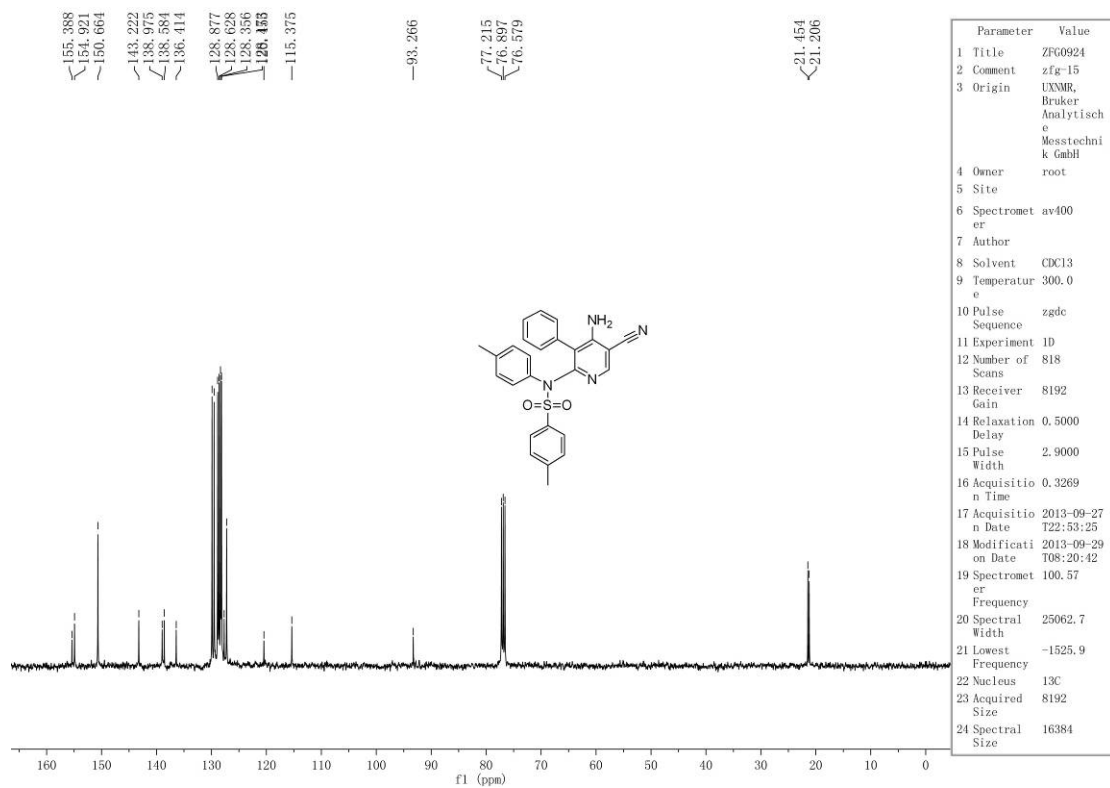

4g

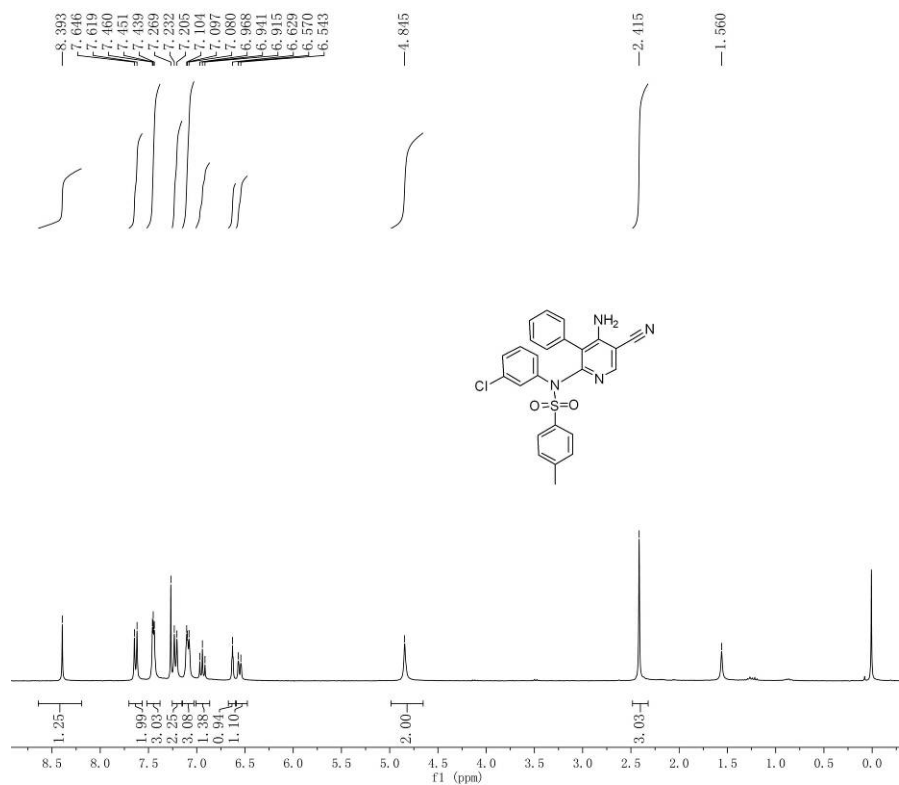

| Parameter                 | Value               |
|---------------------------|---------------------|
| 1 Title                   | zfg-20130828-1h     |
| 2 Comment                 | 1H                  |
| 3 Origin                  | Bruker BioSpin GmbH |
| 4 Owner                   | nmr                 |
| 5 Site                    |                     |
| 6 Spectrometer            | spect               |
| 7 Author                  |                     |
| 8 Solvent                 | CDCl3               |
| 9 Temperature             | 0.0                 |
| 10 Pulse Sequence         | zg30                |
| 11 Experiment             | 1D                  |
| 12 Number of Scans        | 8                   |
| 13 Receiver Gain          | 193                 |
| 14 Relaxation Delay       | 2.0000              |
| 15 Pulse Width            | 10.0000             |
| 16 Acquisition Time       | 2.6477              |
| 17 Acquisition Date       | 2013-08-28T15:40:14 |
| 18 Modification Date      | 2013-08-28T15:40:28 |
| 19 Spectrometer Frequency | 300.13              |
| 20 Spectral Width         | 6188.1              |
| 21 Lowest Frequency       | -1296.3             |
| 22 Nucleus                | 1H                  |
| 23 Acquired Size          | 16384               |
| 24 Spectral Size          | 32768               |

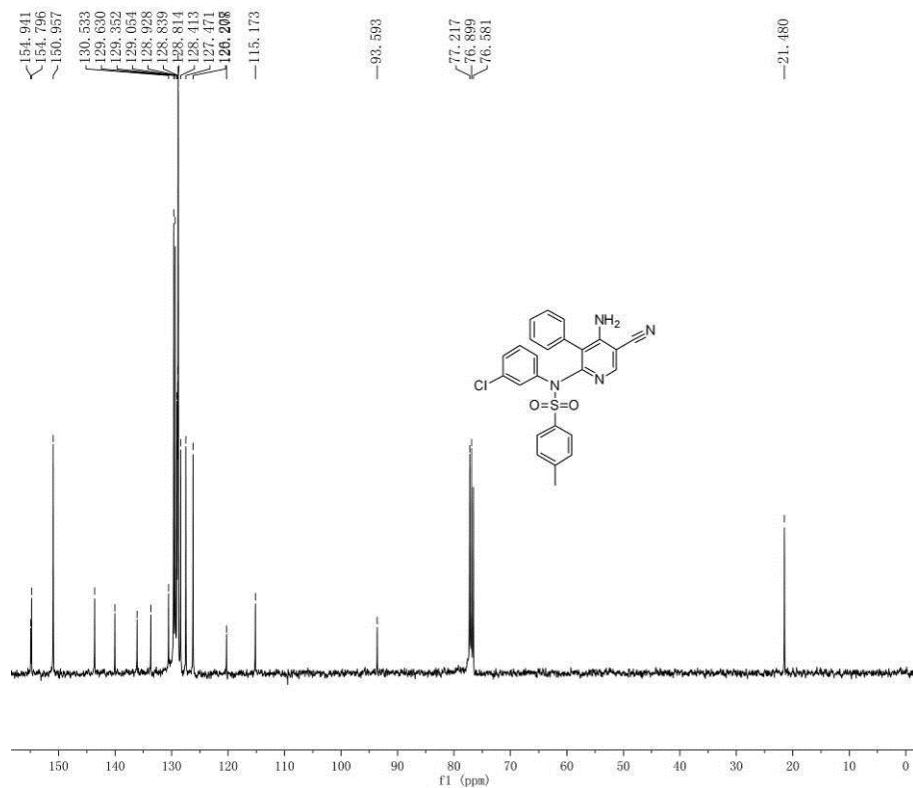

| Parameter                 | Value                                     |
|---------------------------|-------------------------------------------|
| 1 Title                   | ZFG0924                                   |
| 2 Comment                 | zfg-14                                    |
| 3 Origin                  | UNMR, Bruker Analytische Messtechnik GmbH |
| 4 Owner                   | root                                      |
| 5 Site                    |                                           |
| 6 Spectrometer            | av400                                     |
| 7 Author                  |                                           |
| 8 Solvent                 | CDCl3                                     |
| 9 Temperature             | 300.0                                     |
| 10 Pulse Sequence         | zgdc                                      |
| 11 Experiment             | 1D                                        |
| 12 Number of Scans        | 1553                                      |
| 13 Receiver Gain          | 8192                                      |
| 14 Relaxation Delay       | 0.5000                                    |
| 15 Pulse Width            | 2.9000                                    |
| 16 Acquisition Time       | 0.3269                                    |
| 17 Acquisition Date       | 2013-09-27T2:27:08                        |
| 18 Modification Date      | 2013-09-29T10:8:20:34                     |
| 19 Spectrometer Frequency | 100.57                                    |
| 20 Spectral Width         | 25062.7                                   |
| 21 Lowest Frequency       | -1525.9                                   |
| 22 Nucleus                | 13C                                       |
| 23 Acquired Size          | 8192                                      |
| 24 Spectral Size          | 16384                                     |

4h

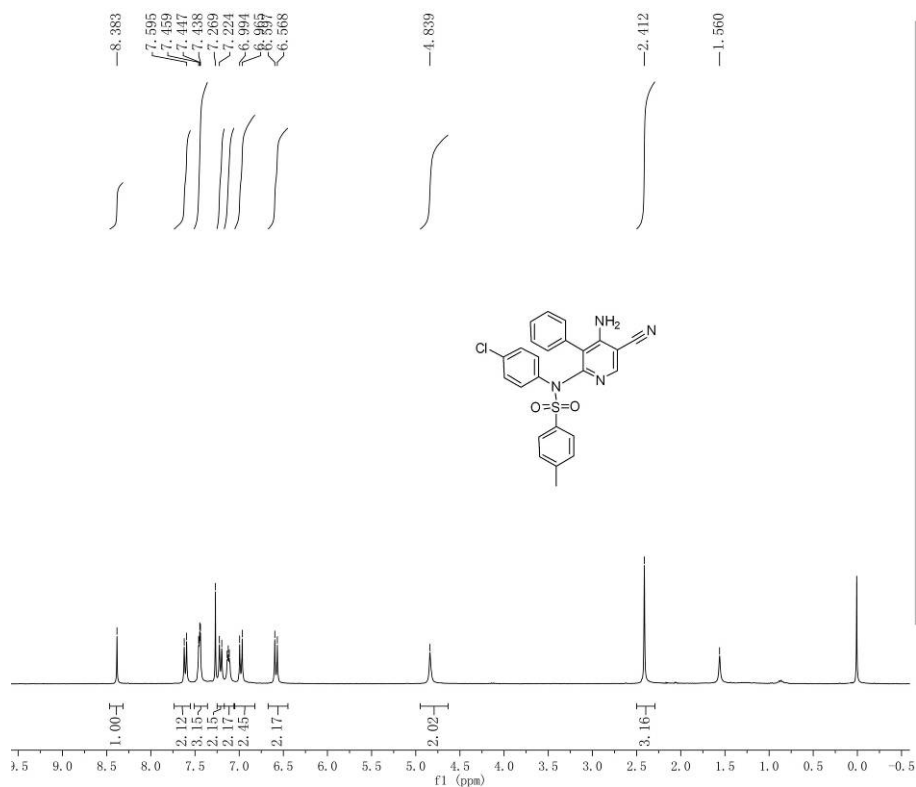

| Parameter                 | Value               |
|---------------------------|---------------------|
| 1 Title                   | zfg-20130828-4h     |
| 2 Comment                 | 4h                  |
| 3 Origin                  | Bruker BioSpin GmbH |
| 4 Owner                   | nmr                 |
| 5 Site                    |                     |
| 6 Spectrometer            | spect               |
| 7 Author                  |                     |
| 8 Solvent                 | CDCl3               |
| 9 Temperature             | 0.0                 |
| 10 Pulse Sequence         | zg30                |
| 11 Experiment             | 1D                  |
| 12 Number of Scans        | 8                   |
| 13 Receiver Gain          | 193                 |
| 14 Relaxation Delay       | 2.0000              |
| 15 Pulse Width            | 10.0000             |
| 16 Acquisition Time       | 2.6477              |
| 17 Acquisition Date       | 2013-08-28T16:01:11 |
| 18 Modification Date      | 2013-08-28T16:01:30 |
| 19 Spectrometer Frequency | 300.13              |
| 20 Spectral Width         | 6188.1              |
| 21 Lowest Frequency       | -1296.3             |
| 22 Nucleus                | 1H                  |
| 23 Acquired Size          | 16384               |
| 24 Spectral Size          | 32768               |

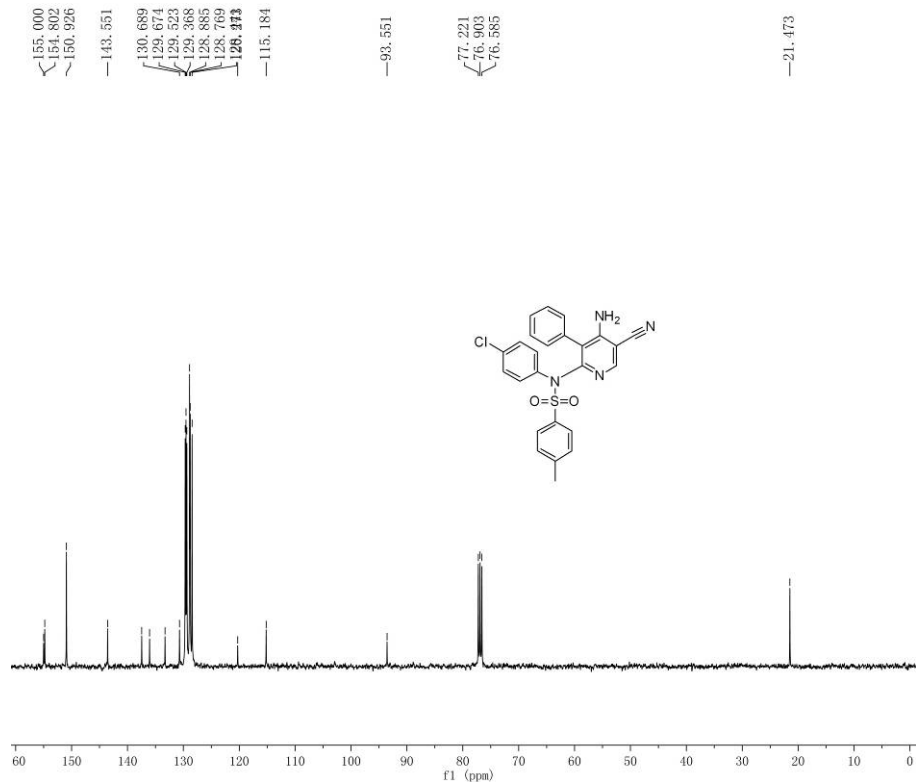

| Parameter                 | Value                                      |
|---------------------------|--------------------------------------------|
| 1 Title                   | ZFG0924                                    |
| 2 Comment                 | zfg-16                                     |
| 3 Origin                  | UXNMR, Bruker Analytische Messtechnik GmbH |
| 4 Owner                   | root                                       |
| 5 Site                    |                                            |
| 6 Spectrometer            | av400                                      |
| 7 Author                  |                                            |
| 8 Solvent                 | CDCl3                                      |
| 9 Temperature             | 300.0                                      |
| 10 Pulse Sequence         | zgdc                                       |
| 11 Experiment             | 1D                                         |
| 12 Number of Scans        | 684                                        |
| 13 Receiver Gain          | 8192                                       |
| 14 Relaxation Delay       | 0.5000                                     |
| 15 Pulse Width            | 2.9000                                     |
| 16 Acquisition Time       | 0.3269                                     |
| 17 Acquisition Date       | 2013-09-27T2 3:03:08                       |
| 18 Modification Date      | 2013-09-29T0 8:20:48                       |
| 19 Spectrometer Frequency | 100.57                                     |
| 20 Spectral Width         | 25062.7                                    |
| 21 Lowest Frequency       | -1525.9                                    |
| 22 Nucleus                | 13C                                        |
| 23 Acquired Size          | 8192                                       |
| 24 Spectral Size          | 16384                                      |

4i

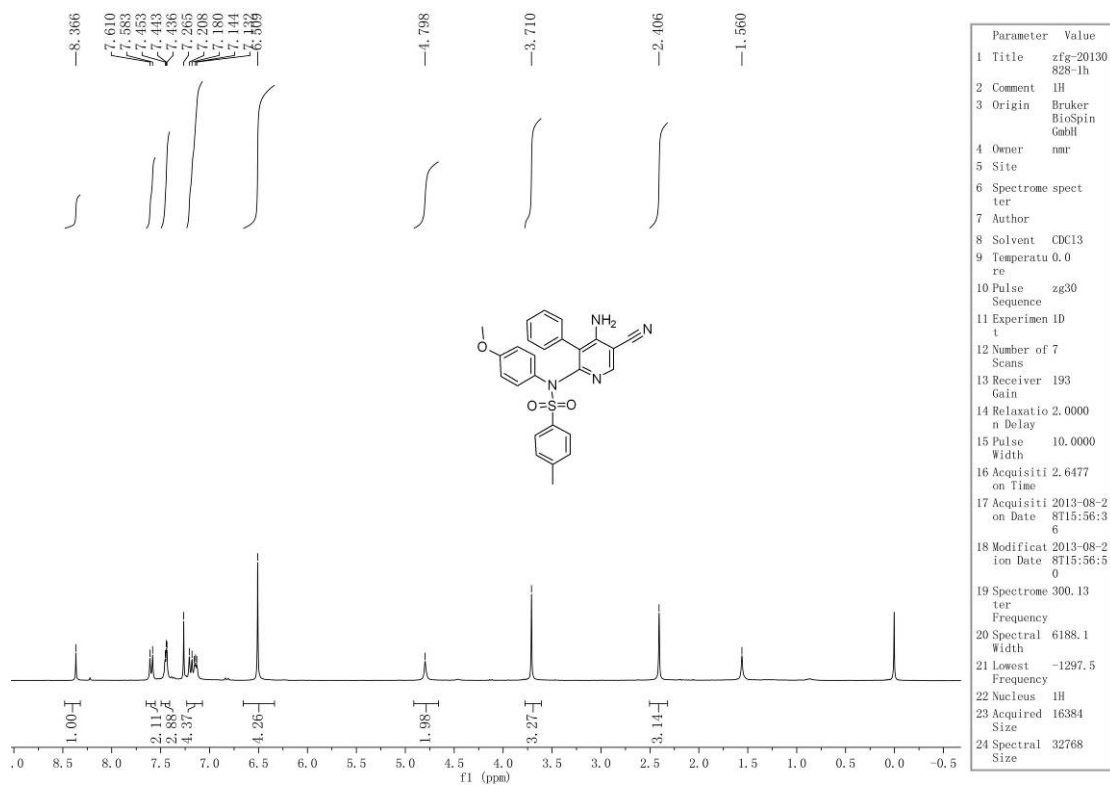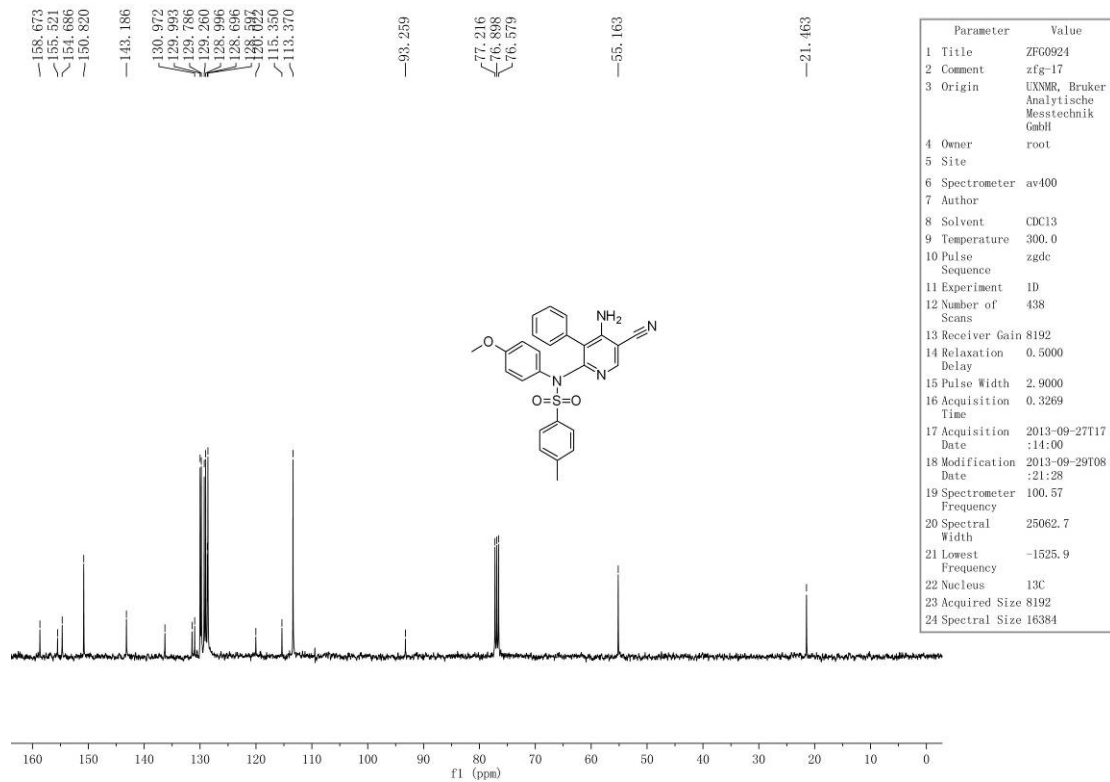

Supplement: c4ra02428a1.pdf [file c4ra02428a1.pdf]
